24 **ABSTRACT**

25 The mechanisms underlying multicellular development in the animal stem lineage may  
26 be reconstructed through the study of choanoflagellates, the closest living relatives of  
27 animals. To determine the genetic underpinnings of multicellularity in the emerging  
28 model choanoflagellate *S. rosetta*, we performed a screen for mutants with defects in  
29 multicellular rosette development. In two of the mutants, Jumble and Couscous, single  
30 cells failed to develop into orderly rosettes but instead aggregated promiscuously into  
31 amorphous clumps of cells. Both mutants mapped to lesions in genes encoding  
32 glycosyltransferases and the mutations perturbed glycosylation patterns in the  
33 extracellular matrix (ECM). In animals, glycosyltransferases transfer activated sugars to  
34 donor molecules and thereby sculpt the polysaccharide-rich ECM, regulate integrin and  
35 cadherin activity, and, when disrupted, contribute to tumorigenesis. The finding that  
36 glycosyltransferases promote proper rosette development and prevent cell aggregation  
37 in *S. rosetta* suggests a pre-metazoan role for glycosyltransferases in regulating  
38 development and preventing abnormal tumor-like multicellularity.

39

40

## 41 INTRODUCTION

42 The evolution of multicellular eukaryotes from their single-celled ancestors was a  
43 major transition in evolutionary history and allowed for the subsequent origin and  
44 diversification of complex macroscopic life (Leigh et al., 1995). However, despite the  
45 centrality of multicellularity to the origin and diversification of animals, little is known  
46 about the genetic and developmental mechanisms that precipitated the transition to  
47 multicellularity in the animal stem lineage. Although the first animals evolved over 600  
48 million years ago, studying their closest living relatives, choanoflagellates, allows the  
49 reconstruction of important aspects of animal origins (Brunet and King, 2017; King et al.,  
50 2008; Ruiz-Trillo et al., 2008; Schalchian-Tabrizi et al., 2008; Sebé-Pedrós et al., 2017).

51 *Salpingoeca rosetta* is an emerging model choanoflagellate that was isolated  
52 from nature as a spherical colony of cells called a rosette. Under standard laboratory  
53 conditions, *S. rosetta* proliferates as solitary cells or as linear chain colonies that easily  
54 break apart into solitary cells (Dayel et al., 2011). When exposed to rosette inducing  
55 factors (RIFs) produced by the co-isolated prey bacterium *Algoriphagus*  
56 *machipongonensis*, *S. rosetta* instead develops into highly organized and structurally  
57 stable rosettes through a process of serial cell division (Alegado et al., 2012; Dayel et  
58 al., 2011; Fairclough et al., 2010; Woznica et al., 2016). Recent advances, including a  
59 sequenced genome (Fairclough et al., 2010), the discovery of a sexual phase to the *S.*  
60 *rosetta* life cycle that enables controlled mating (Levin et al., 2014; Levin and King,  
61 2013; Woznica et al., 2017), and techniques that allow for transfection and expression  
62 of transgenes (Booth et al., 2018) have enabled increasingly detailed studies of  
63 molecular mechanisms underlying rosette development in *S. rosetta*.

64 In a pioneering genetic screen to identify genes required for rosette formation in  
65 *S. rosetta*, multiple rosette defect mutants were recovered that displayed a range of  
66 phenotypes (Levin et al., 2014). The first mutant to be characterized in detail was  
67 named Rosetteless; while Rosetteless cells did not develop into rosettes in the  
68 presence of RIFs, they were otherwise indistinguishable from wild type cells (Levin et  
69 al., 2014). The mutation underlying the Rosetteless phenotype was mapped to a C-type  
70 lectin, encoded by the gene *rosetteless*, the first gene shown to be required for rosette  
71 formation (Levin et al., 2014). In animals, C-type lectins function in signaling and  
72 adhesion to promote development and innate immunity (Cambi et al., 2005; Geijtenbeek  
73 and Gringhuis, 2009; Ruoslahti, 1996; Švajger et al., 2010; Zelensky and Gready,  
74 2005). Although the molecular mechanisms by which *rosetteless* regulates rosette  
75 development remain unknown, the localization of Rosetteless protein to the rosette  
76 interior suggests that it functions as part of the extracellular matrix (ECM) (Levin et al.,  
77 2014).

78 Here we report on the largest class of mutants from the original rosette defect  
79 screen (Levin et al., 2014), all of which fail to develop into organized rosettes and  
80 instead form large, amorphous clumps of cells in both the absence and presence of  
81 RIFs. By mapping the mutations underlying the clumpy, rosette defect phenotypes of  
82 two mutants in this class, we identified two predicted glycosyltransferase genes that are  
83 each essential for proper rosette development. The causative glycosyltransferase  
84 mutations led to similar perturbations in the glycosylation pattern of the basal ECM. The  
85 essentiality of glycosyltransferases for rosette development combined with prior findings  
86 of the requirement of a C-type lectin highlight the importance of the ECM for regulating

87 multicellular rosette development and preventing spurious cell adhesion in a close  
88 relative of animals.

89

## 90 **RESULTS**

### 91 **Rosette defect mutants form amorphous clumps of cells through promiscuous** 92 **cell adhesion**

93 The original rosette defect screen performed by Levin et al., 2014 yielded nine  
94 mutants that were sorted into seven provisional phenotypic classes. For this study, we  
95 screened 21,925 additional clones and identified an additional seven mutants that failed  
96 to form proper rosettes in the presence of *Algoriphagus* RIFs. (For this study, we used  
97 *Algoriphagus* outer membrane vesicles as a source of RIFs, as described in Woznica et  
98 al., 2016). Comparing the phenotypes of the 16 total rosette defect mutants in the  
99 presence and absence of RIFs allowed us to classify four broad phenotypic classes: (1)  
100 Class A mutants that have wild type morphologies in the absence of RIFs and entirely  
101 lack rosettes in the presence of RIFs, (2) Class B mutants that have wild type  
102 morphologies in the absence of RIFs and develop reduced levels of rosettes with  
103 aberrant structures in the presence of RIFs, (3) Class C mutants that produce large  
104 clumps of cells in both the presence and absence of RIFs while forming little to no  
105 rosettes in the presence of RIFs, and (4) a Class D mutant that exist primarily as solitary  
106 cells, with no linear chains of cells detected in the absence of RIFs and no rosettes  
107 detected in the presence of RIFs (Table S1).

108 Of the 16 rosette defect mutants isolated, seven mutants fell into Class C. For  
109 this study, we focused on four Class C mutants — Seafoam, Soapsuds, Jumble, and

110 Couscous (previously named Branched in Levin et al., 2014) — that form amorphous,  
111 tightly packed clumps of cells, both in the presence and absence of RIFs, but never  
112 develop into rosettes (Table 1; Figure 1A,B). We found that the clumps contain a few to  
113 hundreds of mutant cells that pack together haphazardly, unlike wild type rosettes in  
114 which all cells are oriented with their basal poles toward the rosette center and their  
115 apical flagella extending out from the rosette surface (Alegado et al., 2012; Levin et al.,  
116 2014; Woznica et al., 2016). Moreover, in contrast with the structural stability and shear  
117 resistance of wild type rosettes (Figure 1A) (Levin et al., 2014), the cell clumps formed  
118 by Class C mutants were sensitive to shear and separated into solitary cells upon  
119 pipetting or vortexing the culture (Figure 1A).

120         Following exposure to shear, we observed that mutant cells re-aggregated into  
121 new clumps within minutes, while wild type cells never formed clumps (Figure 1C, D;  
122 rare cell doublets were likely due to recent cell divisions). Within 30 minutes after  
123 disruption by shear force, cell clumps as large as 75, 55, 32, and 23 cells formed in  
124 Couscous, Soapsuds, Seafoam, and Jumble mutant cultures, respectively. The cell  
125 aggregation was not strain-specific, as unlabeled Jumble and Couscous mutant cells  
126 adhered to wild type cells identified by their expression of cytoplasmic mWasabi (Figure  
127 1-figure supplement 1). Therefore, the cell clumps are not aberrant rosettes, which  
128 never form through aggregation and instead require at least 15 – 24 hours to develop  
129 clonally through serial rounds of cell division (Dayel et al., 2011; Fairclough et al., 2010).  
130 The fact that the seven Class C mutants isolated in this screen were also defective in  
131 rosette development suggests a direct link between promiscuous cell adhesion and

132 failed rosette development. Each of the mutants tested also displayed a mild defect in  
133 cell proliferation (Figure 1-figure supplement 2).

134

### 135 **Improving genetic mapping in *S. rosetta* through bulk segregant analysis**

136 We next set out to identify the causative mutation(s) underlying the clumping and  
137 rosette defect phenotypes in each of these mutants. In the Levin *et al.* 2014 study, the  
138 Rosetteless mutant was crossed to a phenotypically wild type Mapping Strain  
139 (previously called Isolate B in Levin *et al.*, 2014) and relied on genotyping of haploid F1s  
140 at 60 PCR-verified genetic markers that differed between the Rosetteless mutant and  
141 the Mapping Strain (Levin *et al.*, 2014). The 60 markers were distributed unevenly  
142 across the 55 Mb genome and proved to be insufficient for mapping the Class C  
143 mutants for this study. Compounding the problem, the low level of sequence  
144 polymorphism among *S. rosetta* laboratory strains and abundance of repetitive  
145 sequences in the draft genome assembly (Fairclough *et al.*, 2013; Levin *et al.*, 2014)  
146 made it difficult to identify and validate additional genetic markers, while genotyping at  
147 individual markers proved labor intensive and costly.

148 To overcome these barriers, we modified bulk segregation methods developed in  
149 other systems (Doitsidou *et al.*, 2010; Leshchiner *et al.*, 2012; Lister *et al.*, 2009;  
150 Pomraning *et al.*, 2011; Schneeberger *et al.*, 2009; Voz *et al.*, 2012; Wenger *et al.*,  
151 2010) for use in *S. rosetta*. Our strategy involved: (1) crossing mutants to the Mapping  
152 Strain (which contains previously identified sequence variants); (2) isolating  
153 heterozygous diploids identified through genotyping at a microsatellite on supercontig 1;  
154 (3) inducing meiosis; (4) growing clonal cultures of haploid F1 offspring; (5) phenotyping

155 the F1 offspring; (6) pooling F1 offspring based on their clumping phenotype; and (7)  
156 deeply sequencing pooled genomic DNA from the F1 mutants to find mutations that  
157 segregated perfectly with the clumping phenotype (Figure 2-figure supplement 1).

158 To test whether a bulk segregant approach would work in *S. rosetta*, we first  
159 analyzed a cross between the previously mapped Rosetteless mutant and the Mapping  
160 Strain (Levin et al., 2014). We isolated 38 F1s with the rosette defect phenotype from a  
161 Mapping Strain×Rosetteless cross (Levin et al., 2014), grew clonal cultures from each,  
162 pooled the resulting cultures, extracted their genomic DNA, and sequenced the pooled  
163 mutant genomes to an average coverage of 187X. Against a background of sequence  
164 variants that did not segregate perfectly with the Rosetteless phenotype, five unlinked  
165 single nucleotide variants (SNVs) and insertions/deletions (INDELs) were found to  
166 perfectly segregate with the phenotype (Table S2). Four of these detected sequence  
167 variants likely had spurious correlations with the phenotype resulting from relatively low  
168 sequencing coverage at those variants (>0.25X coverage of the entire genome) (Table  
169 S2). In contrast, the remaining SNV was detected in a well-assembled portion of the  
170 genome at a sequencing depth approaching the average coverage of the entire  
171 genome. The perfectly segregating SNV, at position 427,804 on supercontig 8, was  
172 identical to the causative mutation identified in Levin et al., 2014 (Table S2). Thus, a  
173 method based on pooling F1 haploid mutants, identifying sequence variants that  
174 perfectly segregated with the phenotype, and masking those SNVs/INDELs that were  
175 detected with >0.25X coverage of the total genome was effective for correctly  
176 pinpointing the causal mutation for Rosetteless (Figure 2-figure supplement 1).  
177 Therefore, we used this validated bulk segregant method to map the clumping mutants.



178 Mapping crosses were carried out for the four clumping/rosette defect mutants  
179 characterized in this study (Seafoam, Soapsuds, Jumble, and Couscous) and all four  
180 crosses yielded heterozygous diploids, demonstrating that they were competent to  
181 mate. As observed in prior studies of *S. rosetta* mating (Levin et al., 2014; Woznica et  
182 al., 2017), the diploid cells each secreted a flask-shaped attachment structure called a  
183 theca and were obligately unicellular. Therefore, the heterozygous diploids were not  
184 informative about whether the mutations were dominant or recessive as the phenotypes  
185 could only be detected in haploid cells. For Seafoam and Soapsuds, we isolated  
186 heterozygous diploids, but never recovered F1 offspring with the mutant phenotype  
187 (Table 1). The inability to recover haploids with either clumping or rosette defect  
188 phenotypes from the Seafoam×Mapping Strain and Soapsuds×Mapping Strain crosses  
189 might be explained by any of the following: (1) the clumping/rosette defect phenotypes  
190 are polygenic, (2) meiosis defects are associated with the causative mutations, and/or  
191 (3) mutant fitness defects allowed wild type progeny to outcompete the mutant progeny.  
192 In contrast, heterozygous diploids from crosses of Jumble and Couscous to the  
193 Mapping Strain produced F1 haploid progeny with both wild type and mutant  
194 phenotypes and thus allowed for the successful mapping of the causative genetic  
195 lesions, as detailed below.

196

### 197 **Jumble maps to a putative glycosyltransferase**

198 Following the bulk segregant approach, we identified 5 sequence variants in  
199 Jumble that segregated perfectly with both the clumping and rosette defects. Only one  
200 of these – at position 1,919,681 on supercontig 1 – had sequencing coverage of at least

201 0.25X of the average sequence coverage of the rest of the genome (Figure 2A; Table  
202 S3). In a backcross of mutant F1 progeny to the Mapping Strain, we confirmed the tight  
203 linkage of the SNV to the rosette defect phenotype (Figure 2B). Moreover, all F2  
204 progeny that displayed a rosette defect also had a clumping phenotype. Given the tight  
205 linkage of both traits with the SNV and the absence of any detectable neighboring  
206 sequence variants, we infer that the single point mutation at genome position  
207 1:1,919,681 causes both the clumping and rosette defect phenotypes in Jumble  
208 mutants.

209         The mutation causes a T to C transition in a gene hereafter called *jumble*  
210 (GenBank accession EGD72416/NCBI accession XM\_004998928; Figure 2A). The  
211 *jumble* gene contains a single exon and is predicted to encode a 467 amino acid protein  
212 containing a single transmembrane domain. Following the convention established in  
213 Levin et al. 2014, the mutant allele, which is predicted to confer a leucine to proline  
214 substitution at amino acid position 305, is called *jumble<sup>lw1</sup>*.

215         We used recently developed methods for transgene expression in *S. rosetta*  
216 (Booth et al., 2018) to test whether expression of a *jumble* with an N- or C-terminal  
217 *monomeric teal fluorescent protein (mTFP)* gene fusion under the *S. rosetta elongation*  
218 *factor L (efl)* promoter could complement the mutation and rescue rosette development  
219 in the Jumble mutant (Figure 2C,D). We were able to enrich for rare transfected cells by  
220 using a construct in which the puromycin resistance gene (*pac*) was expressed under  
221 the same promoter as the *jumble* fusion gene, with the two coding sequences separated  
222 by a sequence encoding a self-cleaving peptide (Kim et al., 2011). Transfection of  
223 Jumble mutant cells with wild type *jumble-mTFP* followed by puromycin selection and

224 the addition of RIFs yielded cultures in which  $9.33\% \pm 5.07\%$  of cells were in rosettes  
225 (Figure 2C). Similarly, transfection of Jumble with *mTFP-jumble* followed by puromycin  
226 selection and rosette induction resulted in cultures with  $7.00\% \pm 4.91\%$  of cells in  
227 rosettes (Figure 2C). Importantly, we did not detect any rosettes when we transfected  
228 Jumble cells with *mTFP* alone, *jumble<sup>lw1</sup>-mTFP*, or *mTFP-jumble<sup>lw1</sup>*. Complementation  
229 of the Jumble mutant by the wild type *jumble* allele, albeit in a subset of the population,  
230 provided further confirmation that the *jumble<sup>lw1</sup>* mutation causes the cell clumping and  
231 rosette defect phenotypes. The fact that the transfection experiment did not allow all  
232 cells to develop into rosettes may be due to any number of reasons, including  
233 incomplete selection against untransfected cells, differences in transgene expression  
234 levels in different transfected cells, and the possibility that the mTFP tag reduces or  
235 otherwise changes the activity of the Jumble protein.

236 We next sought to determine the function and phylogenetic distribution of the  
237 *jumble* gene. BLAST searches uncovered unannotated *jumble* homologs in nine other  
238 choanoflagellates (Figure 2-figure supplement 2A) and in fungi, but none in animals.  
239 The choanoflagellate homologs of *jumble* were detected in the transcriptomes of  
240 species representing each of the three major choanoflagellate clades (Richter et al.,  
241 2018), suggesting that *jumble* evolved before the origin and diversification of  
242 choanoflagellates. Although Interpro (Finn et al., 2017) and Pfam (Finn et al., 2016) did  
243 not reveal any known protein domains in Jumble, the NCBI Conserved Domain Search  
244 (Marchler-Bauer et al., 2017) predicted a glycosyltransferase domain with low  
245 confidence (E-value  $3.87^{-03}$ ). Moreover, two different algorithms that use predicted  
246 secondary and tertiary structures to identify potential homologs, HHphred (Zimmermann

247 et al., 2017) and Phyre2 (Kelly et al., 2015), predict that Jumble is related to well-  
248 annotated glycosyltransferases (HHphred: E-value  $7.5^{-19}$  to polypeptide N-  
249 acetylgalactosaminyltransferase 4; Phyre2: Confidence 94.5% to human polypeptide n-  
250 acetylgalactosaminyltransferase 2) (Figure 2-figure supplement 2B). The Leu305Pro  
251 substitution in Jumble<sup>lw1</sup> disrupts a predicted alpha helix, which we hypothesize would  
252 prevent proper folding of the Jumble protein (Figure 2A).

253 Glycosyltransferases play essential roles in animal development (Sawaguchi et  
254 al., 2017; Zhang et al., 2008) and cell adhesion (Müller et al., 1979; Stratford, 1992).  
255 Their biochemical functions include transferring an activated nucleotide sugar, also  
256 called a glycosyl donor, to lipid, protein, or carbohydrate acceptors (Lairson et al.,  
257 2008). Target acceptors in animals include key signaling and adhesion proteins such as  
258 integrins and cadherins, whose activities are regulated by N- and O-linked  
259 polysaccharide modifications, also referred to as N- and O-linked glycans (Larsen et al.,  
260 2017; Zhao et al., 2008). Notably, many well-characterized glycosyltransferases act in  
261 the Golgi apparatus, where they glycosylate molecules that are trafficked through the  
262 secretory system (El-Battari, 2006; Tu and Banfield, 2010). To investigate the  
263 localization of Jumble, we transfected wild type cells with a *jumble-mWasabi* gene  
264 fusion transcribed under the control of the *S. rosetta efl* promoter. Jumble-mWasabi  
265 protein localized to the apical pole of the cell body near the base of the flagellum. Based  
266 on comparisons with transmission electron micrographs of *S. rosetta* and other  
267 choanoflagellates, Jumble-mWasabi localization corresponds to the location of the Golgi  
268 apparatus, for which there is not yet a fluorescent marker in *S. rosetta* (Figure 2E,G;  
269 Figure 2-figure supplement 3A) (Leadbeater, 2015). In contrast, Jumble<sup>lw1</sup>-mWasabi,

270 was distributed in a tubular pattern throughout the cell and co-localized with an  
271 endoplasmic reticulum (ER) marker (Figure 2F,H; Figure 2-figure supplement 3B)  
272 (Booth et al., 2018). The ER localization of Jumble<sup>lw1</sup> is consistent with the hypothesis  
273 that the missense mutation disrupts proper protein folding as often misfolded proteins  
274 are retained in the ER and targeted for degradation (Kopito, 1997). The failure of the  
275 Jumble<sup>lw1</sup> protein to localize properly at the Golgi apparatus strongly suggests a loss of  
276 function.

277

### 278 **Couscous maps to a lesion in a predicted mannosyltransferase**

279 We followed a similar strategy to map the genetic lesion(s) underlying the  
280 Couscous mutant phenotype. Using the bulk segregant approach on F1 mutant  
281 offspring from a Couscous × Mapping Strain cross, we identified eight sequence  
282 variants that segregated perfectly with the clumping and rosette defect phenotypes, of  
283 which only one – a single nucleotide deletion at position 462,534 on supercontig 22 –  
284 had sequencing coverage at least 0.25X of the average sequence coverage of the rest  
285 of the genome (Figure 3A; Table S4). The tight linkage of the deletion to both the  
286 clumping and rosette defect phenotypes was further confirmed by genotyping the  
287 sequence variant in F2 mutants resulting from backcrosses of F1 mutants to the  
288 Mapping Strain (Figure 3B). Given the tight linkage, we infer that the deletion at position  
289 462,534 on supercontig 22 causes both clumping and the disruption of rosette  
290 development in Couscous mutant cells.

291 The single nucleotide deletion at position 462,534 on supercontig 22 sits in a  
292 four-exon gene, hereafter called *couscous* (GenBank accession EGD77026/ NCBI

293 accession XM\_004990809). The mutation causes a predicted frameshift leading to an  
294 early stop codon in the mutant protein, Couscous<sup>lw1</sup> (Figure 3A). As with the Jumble  
295 mutant, we were able to rescue rosette formation in a portion of the population by  
296 transfecting cells with either a *couscous-mTFP* or *mTFP-couscous* gene fusion under  
297 the *efl* promoter (Figure 3C, D), thereby increasing our confidence in the mapping  
298 results.

299         The predicted Couscous amino acid sequence contains a specific type of  
300 glycosyltransferase domain, an alpha-mannosyltransferase domain, that transfers  
301 activated mannose onto the outer chain of core N-linked polysaccharides and O-linked  
302 mannotriose (Strahl-Bolsinger et al., 1999). The predicted mannosyltransferase domain  
303 shares 28% and 35% amino acid sequence identity to alpha 1-2 mannosyltransferase  
304 (MNN2) proteins in *Saccharomyces cerevisiae* and *Candida albicans*, respectively,  
305 including the conserved DXD motif found in many families of glycosyltransferases  
306 (Wiggins and Munro, 1998) (Figure 3-figure supplement 1A). MNN2 proteins catalyze  
307 the addition of the first branch of mannose-containing oligosaccharides found on cell  
308 wall proteins (Rayner and Munro, 1998) and proper MNN2 activity is required for  
309 flocculation, or non-mating aggregation, in *S. cerevisiae* (Stratford, 1992). In addition to  
310 the mannosyltransferase domain, Couscous is predicted to have a PAN/Apple domain  
311 composed of a conserved core of three disulfide bridges (Ho et al., 1998; Tordai et al.,  
312 1999). PAN/Apple domains are broadly distributed among eukaryotes, including  
313 animals, where they mediate protein-protein and protein-carbohydrate interactions,  
314 often on the extracellular surface of the cell (Ho et al., 1998; Tordai et al., 1999).

315 In wild type cells transfected with a *couscous-mWasabi* transgene under the *efl*  
316 promoter, Couscous was found in puncta scattered about the cytosol, collar and cell  
317 membrane (Figure 3-figure supplement 1B, C). While Couscous-mWasabi was clearly  
318 not localized to the Golgi, the puncta may co-localize with the ER, where  
319 glycosyltransferases are also known to function (El-Battari, 2006; Tu and Banfield,  
320 2010). However, despite attempting to co-transfect cells with *couscous-mWasabi* and a  
321 marker of the ER, we were unable to detect any cells expressing both constructs. In  
322 addition, it is possible that the fusion of Couscous to a fluorescent protein or its  
323 overexpression interfered with its proper localization in *S. rosetta*. Therefore, we are  
324 currently uncertain about the subcellular localization of Couscous protein.

325

### 326 **Jumble and Couscous mutants lack proper sugar modifications at the basal pole**

327 Because both Jumble and Couscous have mutations in putative  
328 glycosyltransferases, we hypothesized that the abundance or distribution of cell surface  
329 sugars, called glycans, on Jumble and Couscous mutant cells might be altered. To  
330 investigate the distribution of cell surface glycans, we stained live *S. rosetta* with diverse  
331 fluorescently labelled sugar-binding lectins. Of the 22 lectins tested, 21 either did not  
332 recognize *S. rosetta* or had the same staining pattern in wild type, Jumble and  
333 Couscous cells (Table S5).

334 The remaining lectin, jacalin, bound to the apical and basal poles of wild type  
335 cells (Figure 4A, B, B'). Jacalin also brightly stained the ECM filling the center of  
336 rosettes in a pattern reminiscent of the Rosetteless C-type lectin (Levin et al., 2014)  
337 (Figure 4A, B'), although the two were not imaged simultaneously because jacalin does

338 not bind after cell fixation and labelled Rosetteless antibodies accumulate strongly in the  
339 food vacuoles of live cells. In contrast with wild type cells, the basal patch of jacalin  
340 staining was absent or significantly diminished in Couscous and Jumble mutants, both  
341 in the presence and absence of RIFs (Figure 4 C-F). Interestingly, the apical patch of  
342 jacalin staining in mutant cells appeared similar to wild type cells. This may explain the  
343 lack of a clear difference in bands detected with jacalin by western blot between wild  
344 type and mutants whole cell lysates (Figure 4-figure supplement 1).

345         The loss of basal jacalin staining indicated that the Jumble and Couscous  
346 mutations either disrupt proper trafficking of sugar-modified molecules to the basal pole  
347 of cells or alter the glycosylation events themselves. Thus, we examined whether the  
348 basal secretion of Rosetteless protein was disrupted in the mutant strains. In both  
349 Jumble and Couscous, Rosetteless properly localized to the basal pole, but its  
350 expression did not increase nor was it secreted upon treatment with RIFs, as normally  
351 occurs in wild type cells (Figure 4-figure supplement 2). Because Rosetteless is  
352 required for rosette development, this failure to properly upregulate and secrete  
353 Rosetteless might contribute to the rosette defect phenotype in Jumble and Couscous  
354 cells.

355

## 356 **DISCUSSION**

357         Of the 16 rosette defect mutants isolated in Levin *et al.* 2014 and in this study,  
358 almost half (7) also display a mild to severe clumping phenotype. This suggests that  
359 mechanisms for preventing promiscuous adhesion among wild type cells can be easily  
360 disrupted. We found that the clumping phenotype results from promiscuous adhesion of



361 mutant cells to other mutant or wild type cells rather than from incomplete cytokinesis. A  
362 recent study revealed that the bacterium *Vibrio fischeri* induces *S. rosetta* to form  
363 swarms of cells, visually similar to the mutant clumps, as part of their mating behavior  
364 (Woznica et al., 2017). However, it seems unlikely that the clumping Class C mutants is  
365 related to swarming; the cell fusion and subsequent settling of diploid cells characteristic  
366 of *V. fischeri*-induced mating have not been observed in the class C mutants cultured  
367 without *V. fischeri*.

368         For both Jumble and Couscous, the causative mutations mapped to predicted  
369 glycosyltransferase genes. Consistent with its role as a glycosyltransferase, Jumble  
370 localized to the Golgi apparatus, but Couscous appeared to localize in cytoplasmic  
371 puncta and to the cell membrane. We predict that the glycosyltransferase mutations are  
372 loss of function alleles, given that transfection of mutant *S. rosetta* with the wild type  
373 alleles was sufficient to complement each of the mutations. While we have not  
374 uncovered the target(s) of the glycotransferases or the exact nature of the interplay  
375 between the two phenotypes, disruption of the glycocalyx at the basal pole of both  
376 Jumble and Couscous mutant cells (Figure 4) hints that the regulation of ECM could  
377 play a role in preventing clumping and in promoting proper rosette development.

378         One possible explanation for the clumping phenotype is that *jumble* and  
379 *couscous* are required to regulate the activity of cell surface adhesion molecules and  
380 receptors. Glycosylation regulates the activities of two key adhesion proteins in animals:  
381 integrins that regulate ECM adhesion, and cadherins that, among their various roles in  
382 cell signaling and animal development, bind other cadherins to form cell-cell adhesions  
383 called adherens junctions (Larsen et al., 2017; Zhao et al., 2008). Cadherin activity can

384 be either positively or negatively regulated by glycosyltransferases. For example,  
385 epithelial cadherin (E-cadherin) is modified by N-acetylglucosaminyltransferase III (GnT-  
386 III) whose activity leads to increased cell adhesion and N-acetylglucosaminyltransferase  
387 V (GnT-V) whose activity leads to decreased cell adhesion (Carvalho et al., 2016;  
388 Granovsky et al., 2000). GnT-V knockdown enhances cell-cell adhesion mediated by E-  
389 cadherin and the related N-cadherin (Carvalho et al., 2016; Guo et al., 2009). The  
390 inactivation of E-cadherin, including through over- or under- expression of GnT-V or  
391 GnT-III, is considered to be a hallmark of epithelial cancers (Hirohashi and Kanai,  
392 2003). *S. rosetta* expresses 29 different cadherins (Nichols et al., 2012) and it is  
393 possible that mutations to *jumble* and *couscous* disrupt regulatory glycosylation of a cell  
394 adhesion molecules like cadherins.

395 Another possibility is that *jumble* and *couscous* add a protective sugar layer to  
396 the cell surface and loss of glycosyltransferase activity reveals underlying sticky  
397 surfaces. If *jumble* and *couscous* add branches to existed sugar modifications, their loss  
398 of function could expose new sugar moieties at the cell surface that act as ligands for  
399 lectins that aggregate cells. Lectins mediate cell aggregation in diverse organisms  
400 (Colin Hughes, 1992). For example, sponges such as *Geodia cydonium* can be  
401 disaggregated into single cells and then reaggregated through lectin binding of a post-  
402 translational sugar modification (Müller et al., 1979). In *S. cerevisiae*, the  
403 mannosyltransferase MNN2 adds mannose structures to the cell wall that are  
404 recognized by aggregating lectins and MNN2 is required for proper flocculation (Rayner  
405 and Munro, 1998; Stratford, 1992). Exposing new sugars on the cell surface in *Jumble*

406 and Couscous could lead to spurious aggregation, potentially by lectins or other sugar  
407 binding proteins.

408         It is somewhat more difficult to infer how increased clumping in single cells might  
409 interfere with rosette development. One possibility is that the disruption of ECM  
410 glycosylation that we hypothesize might promote clumping may also prevent the proper  
411 maturation of the ECM needed for rosette development (Figure 5). A prior study showed  
412 that only *S. rosetta* cells recognized with the lectin wheat germ agglutinin (WGA) are  
413 competent to form rosettes, which suggests that glycosylation might be necessary for  
414 rosette development (Dayel et al., 2011). While WGA staining does not appear to be  
415 perturbed in Jumble and Couscous (Table S2), jacalin staining at the basal pole  
416 appears severely reduced or abolished compared to wild type. Jacalin staining was  
417 enriched in the center of wild type rosettes in a pattern reminiscent of Rosetteless,  
418 which is required for rosette development (Levin et al., 2014). Intriguingly, in Jumble  
419 and Couscous, Rosetteless localized to the correct pole, but did not become enriched  
420 upon rosette induction, indicating that the ECM did not properly mature. Rosetteless has  
421 mucin-like Ser/Thr repeats that are predicted sites of heavy glycosylation and two C-  
422 type lectin domains that would be expected to bind to sugar moieties (Levin et al.,  
423 2014). Therefore, it is possible that Rosetteless might be regulated either through direct  
424 glycosylation or through the glycosylation of potential binding partners by Jumble and  
425 Couscous.

426         The clumping, rosetteless mutants underscore the differences between cell  
427 aggregation and a regulated clonal developmental program, such as embryogenesis or  
428 rosette development. Aggregation is hypothesized to only be evolutionarily stable if

429 limited to close relatives (Gilbert et al., 2007; Kuzdzal-Fick et al., 2011). Recent efforts  
430 to experimentally evolve multicellularity in yeast and the green alga *Chlamydomonas*  
431 *reinhardtii* have all resulted in isolates that formed clonally and not through aggregation  
432 (Herron et al., 2018; Ratcliff et al., 2013, 2012). Although aggregation and clonal  
433 multicellularity both rely on cell-cell adhesion and cell signaling, the fact that they are  
434 mutually exclusive in *S. rosetta* and in experimental evolution studies argues against  
435 their co-occurrence in the animal stem lineage.

436

## 437 **MATERIALS AND METHODS**

### 438 **Media preparation, strains, and cell culture**

439 Unenriched artificial seawater (ASW), AK artificial seawater (AK), cereal grass  
440 media (CG), and high nutrient (HN) media were prepared as described previously  
441 (Booth et al., 2018; Levin et al., 2014; Levin and King, 2013). The wild type strain, from  
442 which each mutant was generated, was the described strain SrEpac (ATCC PRA-390;  
443 accession number SRX365844) in which *S. rosetta* is co-cultured monoxenically with  
444 the prey bacterium *Echinicola pacifica* (Levin et al., 2014; Levin and King, 2013;  
445 Nedashkovskaya et al., 2006). Seafoam, Soapsuds, and Couscous (previously named  
446 Branched) were generated through X-ray mutagenesis and Jumble was generated by  
447 EMS mutagenesis as documented in Levin et al., 2014. For routine culturing, wild type  
448 and mutant cultures were diluted 1:10 every 2-3 days in HN media. The Mapping Strain,  
449 (previously called Isolate B in Levin et al., 2014) used for mapping crosses (accession  
450 number SRX363839) was grown in the presence of rosette-inducing *A.*  
451 *machipongonensis* bacteria (ATCC BAA-2233). The Mapping Strain was maintained in

452 25% CG media diluted in ASW and passaged 1:10 every 2-3 days. For transfection of  
453 *S. rosetta*, cells were maintained in 5% (vol/vol) HN media in AK seawater (Booth et al.,  
454 2018). Rosette induction was performed with *A. machipongonensis* outer membrane  
455 vesicles (OMVs) prepared as in Woznica et al., 2016 and referred to here as rosette  
456 inducing factors (RIFs).

#### 457 **Imaging and quantifying rosette phenotypes**

458 To image rosette phenotypes (Figure 1A), cells were plated at a density of  $1 \times 10^4$   
459 cells/ml in 3 ml HN media either with or without *Algoriphagus* RIFs. Cultures were  
460 imaged after 48 hr of rosette induction in 8-well glass bottom dishes (Ibidi 15  $\mu$ -Slide 8  
461 well Cat. No. 80826) that were coated with 0.1 mg/mL poly-D-lysine (Sigma) for 15 min  
462 and washed 3 times with water to remove excess poly-D-lysine. For imaging wild type  
463 and mutant cultures in the presence and absence of RIFs (Figure 1A top two panels),  
464 200  $\mu$ l of cells were plated with a wide bore pipette tip for minimal disruption and  
465 allowed to settle for 5 min. For images of vortexed cells (Figure 1A bottom panel), 200  
466  $\mu$ l of cells were vortexed for 15 s before plating and imaged within 10 min of plating to  
467 prevent re-clumping. Cells were imaged live by differential interference contrast  
468 microscopy using a Zeiss Axio Observer.Z1/7 Widefield microscope with a Hamamatsu  
469 Orca-Flash 4.0 LT CMOS Digital Camera and a 63x/NA1.40 Plan-Apochromatic oil  
470 immersion lens with 1.6X optivar setting.

471 To quantify rosette induction (Figure 1B), cells were plated at a density of  $1 \times 10^4$   
472 cells/ml in 3 ml HN media with RIFs. After 48 hr, an aliquot of cells was vortexed  
473 vigorously for 15 secs and fixed with formaldehyde. To determine the percentage of  
474 cells in rosettes, the relative number of single cells and cells within rosettes were scored

475 using a hemocytometer. Rosettes were counted as a group of 3 or more cells with  
476 organized polarity relative to a central focus after exposure to vortexing.

#### 477 **Imaging and quantification of cell clumping**

478 Clumps were quantified using a modified protocol from Woznica et al., 2017  
479 (Figure 1C). To prevent cells from sticking to the bottom of the glass dishes, 8 well  
480 glass bottom dishes (Ibidi 15  $\mu$ -Slide 8 well Cat. No. 80826) were coated with 1% BSA  
481 for 1 hr and washed 3 times with water to remove any residual BSA. Cells were diluted  
482 to  $5 \times 10^5$  cells/mL, vortexed for 15 s to break apart any pre-formed clumps and plated in  
483 the BSA pre-treated dishes. For quantification, DIC images were taken using a Zeiss  
484 Axio Observer.Z1/7 Widefield microscope with a Hamamatsu Orca-Flash 4.0 LT CMOS  
485 Digital Camera and a 20x objective. Images were collected for each strain from 10  
486 distinct locations throughout the well.

487 Images were batch processed in ImageJ for consistency. To accurately segment  
488 the phase bright cells and limit signal from the phase dark bacteria the following  
489 commands were applied with default settings: 'Smooth' (to reduce background bacterial  
490 signal), 'Find Edges' (to highlight the phase-bright choanoflagellate cells), 'Despeckle'  
491 (to remove noise), 'Make Binary' (to convert to black and white), 'Dilate' (to expand to  
492 smooth jagged edges from segmentation), 'Erode' (to return to the same size as before  
493 dilate), and 'Fill Holes' (to fill any remaining small holes). Finally, images were analyzed  
494 with the 'Analyze Particles' command to calculate the area of the clump and only  
495 particles larger than  $20 \mu\text{m}^2$  were kept to filter out any remaining bacterial signal. Cell  
496 equivalents/clump (Figure 1C, right y axis) were calculated by dividing the area of the  
497 clump by the area of a representative individual cell (as approximated by averaging the

498 area of the wild type cells). Data are presented as violin boxplots, showing the median  
499 cell number (middle line), interquartile range (white box), and range excluding outliers  
500 (thin line). A minimum of 630 clumps from two biological replicates were measured for  
501 each condition.

## 502 **Performing mapping crosses**

503 Mapping crosses for each mutant strain (Seafoam, Soapsuds, Jumble, and  
504 Couscous) with Mapping Strain (previously described as Isolate B) were attempted  
505 using both methods previously shown to induce mating in *S. rosetta*: nutrient limitation  
506 for 11 days and addition of 2.5-5% *V. fischeri* conditioned media (Levin and King, 2013;  
507 Woznica et al., 2017). Both methods were effective at inducing mating for all attempted  
508 crosses; here, we report which method was used to generate data for each individual  
509 cross. Cells induced to mate were plated by limiting dilution to isolate diploid clones.  
510 Clonal isolates were allowed to grow for 5-7 days and screened for populations of  
511 thecate cells, as these are the only documented diploid cell type (Levin et al., 2014;  
512 Woznica et al., 2017). From each population of thecate cells, we extracted DNA from 75  
513  $\mu$ l of cells by scraping cells from the plate, harvesting and pelleting the cells,  
514 resuspending in 10  $\mu$ l of base solution (25 mM NaOH, 2 mM EDTA), transferring  
515 samples into PCR plates, boiling at 100°C for 20 min, followed by cooling at 4°C for 5  
516 min, and then adding 10  $\mu$ l Tris solution (40 mM Tris-HCl, pH 7.5). We used 2  $\mu$ l of this  
517 sample as the DNA template for each genotyping reaction. We identified heterozygous  
518 strains through genotyping by PCR at a single microsatellite genotyping marker at  
519 position 577,135 on supercontig 1 (Forward primer: GACAGGGCAAACAGACAGA  
520 and Reverse primer: CCATCCACGTTTCATTCTCCT) that distinguishes a 25 bp deletion

521 in the Mapping Strain (199 bp) from the strain used to generate the mutants (217 bp).  
522 Isolates containing PCR products of both sizes were inferred to be diploid. Meiosis was  
523 induced by rapid passaging every day in CG medium. For both Seafoam and Soapsuds,  
524 we were able to generate putative outcrossed diploids by crossing to the Mapping Strain  
525 based on the genotyping marker on supercontig 1, but we only could only clonally  
526 isolate populations of F1 haploids with rosettes and never isolated any F1 haploids with  
527 the clumpy, rosetteless phenotype.

528 For the successful cross of Jumble to the Mapping Strain, we induced mating by  
529 starvation using the approach of Levin and King 2013. First, we started with rapidly  
530 growing, regularly passaged strains, pelleted  $2 \times 10^6$  cells/mL of each strain together and  
531 resuspended in 10mL of ASW lacking any added nutrients. After 11 days of starvation in  
532 ASW, we pelleted all cells (presumably including diploid cells resulting from mating) and  
533 resuspended in 100% CG media to recover any diploids. After 3 days of recovery, we  
534 isolated clones by limiting dilution in 10% CG media in ASW (vol/vol). The probability of  
535 clonal isolation in this step was 0.91-0.93 (calculated using the Poisson distribution and  
536 the number of choanoflagellate-free wells per plate; Levin and King, 2013). Three  
537 clonally isolated heterozygous populations, each containing almost exclusively thecate  
538 cells, were identified through genotyping by PCR at a supercontig 1 microsatellite as  
539 described above. To induce meiosis, heterozygotes were diluted 1:2 in 25% CG media  
540 in ASW (vol/vol) every 1-2 days for 8 days. As soon as rosettes and swimming cells  
541 were observed, we repeated the serial dilution to isolate clones (probability of clonal  
542 isolation 0.85-0.98). We collected any clonally isolated populations that formed rosettes  
543 or clumps and ignored any wells containing thecate cells assuming that these



544 represented diploid cells that had not undergone meiosis. 56% of all non-thecate  
545 isolates displayed the cell clumping phenotype and 44% of all non-thecate isolates were  
546 capable of forming rosettes, consistent with Mendelian segregation of a single locus  
547 ( $X^2=1.162$ ,  $df=1$ ,  $p=0.28$ ). Isolates were genotyped with the marker on supercontig 1 to  
548 ensure that independent assortment of the genotype and the phenotype indeed  
549 occurred. In total, 30 clumpy F1s were collected for bulk segregation analysis.

550 For the successful Couscous cross, we induced mating using *V. fisheri*  
551 conditioned media using the approach of Woznica et al., 2017. A mixture of  $1 \times 10^6$   
552 Couscous and Mapping Strain cells at stationary growth were pelleted and resuspended  
553 in 5% *V. fisheri* conditioned media in ASW (vol/vol). After 24 hr, the cells were pelleted,  
554 resuspended in 5% HN media in ASW (vol/vol), and allowed to recover for 24 hr. We  
555 then isolated clones by limiting dilution in 10% CG media in ASW (vol/vol). The  
556 probability of clonal isolation in this step was between 0.97-0.98. We extracted DNA as  
557 described above and identified heterozygous clones through genotyping by PCR at a  
558 single microsatellite genotyping marker on supercontig 1. Four clonally isolated  
559 heterozygous populations, containing almost exclusively thecate cells, were identified.  
560 To induce meiosis, heterozygotes were passaged 1:2 in 25% CG media in ASW  
561 (vol/vol) every 1-2 days for 8 days. As soon as rosettes and swimming cells were  
562 observed, we repeated clonal isolation (probability of clonal isolation 0.78-0.97). We  
563 collected any clonally isolated populations that formed rosettes or clumps and ignored  
564 any wells containing thecate cells assuming that these represented diploid cells that had  
565 not undergone meiosis. Only 14.6% of non-thecate isolates were clumps; this deviation  
566 from a Mendelian ratio ( $X^2=225.63$ ,  $df=1$ ,  $p<0.5 \cdot 34^{-51}$ ) may indicate a potential fitness

567 defect of the mutant phenotype. Isolates were genotyped with the marker on  
568 supercontig 1 to ensure that independent assortment indeed occurred. In total, 22  
569 clumpy F1s were collected for bulk segregant analysis.

### 570 **Whole genome sequencing**

571 Jumble and Couscous were whole genome sequenced individually to identify the  
572 mutation(s) carried in each strain. To do this, Jumble and Couscous cells were grown to  
573 stationary phase in 500 mL of 5% HN media in ASW (vol/vol). To generate pooled  
574 genomic DNA for bulk segregant analysis, we grew up  $5 \times 10^6$  cells of each of the 38 F1s  
575 with the rosetteless phenotype from the Rosetteless $\times$ Mapping Strain cross (Levin et al.,  
576 2014),  $5 \times 10^6$  cells of each of the 30 F1s with the clumpy phenotype from the  
577 Jumble $\times$ Mapping Strain cross, and  $5 \times 10^6$  cells of each of the 22 F1s with the clumpy  
578 phenotype from the Couscous $\times$ Mapping Strain cross. For each cross, the F1 cells were  
579 pelleted, frozen, and combined during lysis for DNA extraction. For all samples, we  
580 performed a phenol-chloroform DNA extraction and used a CsCl gradient to separate *S.*  
581 *rosetta* DNA from contaminating *E. pacifica* DNA by GC content (King et al., 2008).

582 Multiplexed, 150 bp paired-end libraries were prepared and sequenced on an  
583 Illumina HiSeq 4000. Raw reads were trimmed with TrimmomaticPE (Bolger et al.,  
584 2014) to remove low quality base calls. Trimmed reads were mapped to the *S. rosetta*  
585 reference genome (Fairclough et al., 2013) using Burrows-Wheeler Aligner (Li and  
586 Durbin, 2009), and we removed PCR duplicates with Picard  
587 (<http://broadinstitute.github.io/picard/>). We realigned reads surrounding indel calls using  
588 GATK (Depristo et al., 2011) and called variants using SAMtools and bcftools (Li et al.,  
589 2009).

## 590 **Bulk segregant sequencing analysis**

591 No large region of the genome (i.e. haplotype block) was found to co-segregate  
592 with the mutant phenotype in any of the crosses, likely because of the sparse, uneven  
593 distribution of genetic markers and/or high recombination rates. Sequence variants from  
594 the pooled samples were culled using vcftools vcf-isec (Danecek et al., 2011): (1) to  
595 keep only any sequence variants in the pooled samples that were shared with the  
596 parental mutant strain since any causative mutations should be present in both the  
597 pooled sample and the parental mutant strain, and (2) to remove any sequence variants  
598 in the pooled samples that were shared with the Mapping Strain (Isolate B), wild type  
599 (previously Isolate C), or the unmutagenized control from the Rosetteless mutagenesis  
600 (C2E5) since any of these sequence variants should not be causative for rosette defects  
601 (Levin et al., 2014; Levin and King, 2013). The remaining variants were filtered by  
602 quality: depth >2, quality score >10, and reference allele not N. The remaining list  
603 represents high quality variants in the pooled population that are shared with the mutant  
604 to the exclusion 3 different strains competent to form rosettes. Segregating variants  
605 were determined by dividing the number of reads that map to the alternative allele by  
606 the total number of high quality reads determined by SAMtools and bcftools (Li et al.,  
607 2009); any variants with >99% of reads that map to the alternative allele were  
608 considered variants that segregated perfectly with the mutant phenotype.

## 609 **Backcrosses**

610 To test the linkage of clumpy phenotype and the predicted causative mutation  
611 from the bulk segregant analysis, F1s with the clumpy phenotype from the  
612 Jumble×Mapping Strain and Couscous×Mapping Strain were backcrossed to the

613 Mapping Strain. For the Jumble F1 backcross,  $1 \times 10^6$  cells grown up from a clonally  
614 isolated F1 with the clumpy phenotype from Jumble  $\times$  Mapping Strain and  $1 \times 10^6$  Mapping  
615 Strain cells were mixed, pelleted, and resuspended in 10 mL of 5% *V. fischeri*  
616 conditioned media in ASW (vol/vol). After 24 hr, the *V. fischeri* conditioned media was  
617 replaced with 25% CG media in ASW (vol/vol) and cells were plated to limiting dilution.  
618 Clonally isolated thecate populations were genotyped by PCR of the microsatellite on  
619 supercontig 1 as described above and 4 heterozygous diploids populations were  
620 identified (probability of clonal isolation 0.79-0.95). The heterozygotes were rapidly  
621 passaged for 2 weeks to induce meiosis before being plated for clonal isolation  
622 (probability of clonal isolation 0.95-0.98). 12 F2s with the clumpy phenotype and 9 F2s  
623 with the rosette phenotype were identified (Figure 2B). Their DNA was extracted using  
624 Base-Tris method described above and the region around the causal mutation was  
625 amplified. The resultant PCR product was digested for 4 hr with Bfal, which cleaves the  
626 mutant allele but not the wild type allele, and products of the digest were distinguished  
627 by agarose gel electrophoresis.

628 For the two Couscous F1 backcrosses,  $2.5 \times 10^5$  cells from either one of two F1s  
629 with the clumpy phenotype from Couscous  $\times$  Mapping Strain cross and  $2.5 \times 10^5$  Mapping  
630 Strain cells were mixed, pelleted, resuspending in 0.5 mL of 2.5% *V. fischeri*  
631 conditioned media in ASW (vol/vol). After 24 hr, *V. fischeri* conditioned media was  
632 replaced with 25% CG media in ASW (vol/vol) and cells were plated to limiting dilution  
633 (probability of clonal isolation 0.85-0.97). Clonally isolated thecate populations were  
634 genotyped by PCR of the microsatellite on supercontig 1 as described above and 3  
635 heterozygous diploids (6 total) were identified in each cross. Isolates were rapidly

636 passaged for 2 weeks to induce meiosis before being plated for clonal isolation  
637 (probability of clonal isolation 0.88-0.97). 51 F2s with the clumpy phenotype and 38 F2s  
638 with the rosette phenotype were identified (Figure 3B); their DNA was extracted using  
639 Base-Tris method described above, the region around the causal mutation was  
640 amplified, and the resultant PCR product was Sanger sequenced.

#### 641 **Jumble and Couscous domain and structure prediction and alignment**

642 Protein domains encoded by *jumble* (Figure 2A) and *couscous* (Figure 3A) were  
643 predicted using Interpro (Finn et al., 2017), PFAM (Finn et al., 2016), and the NCBI  
644 Conserved Domain Search (Marchler-Bauer et al., 2017). Structural homology analysis  
645 of Jumble was performed with Phyre2 (Kelly et al., 2015) and HHphred (Zimmermann et  
646 al., 2017). The structure of the human N-acetylgalactosaminyltransferase 4 (GlcNAc T4)  
647 catalytic domain (HHphred: E-value  $7.5^{-19}$ ) was aligned to the predicted Jumble  
648 structure generated by HHphred using the PyMOL Molecular Graphics System, Version  
649 2.0 Schrödinger, LLC (Figure 2-figure supplement 2B). Other choanoflagellate  
650 homologs of *jumble* were determined by reciprocal BLAST of the 20 sequenced  
651 choanoflagellate transcriptomes (Richter et al., 2018) and alignment was performed with  
652 ClustalX (Larkin et al., 2007) (Figure 2-figure supplement 2A). The alignment of  
653 Couscous to yeast MNN2 glycosyltransferase domains were performed with ClustalX  
654 (Larkin et al., 2007) (Figure 3-figure supplement 1).

#### 655 **Generating transgenic constructs**

656 Jumble (GenBank accession EGD72416/NCBI accession XM\_004998928) and  
657 Couscous (GenBank accession EGD77026/ NCBI accession XM\_004990809) were  
658 cloned from wild type cDNA prepared as described in Booth et al., 2018. Jumble<sup>lw1</sup> was

659 cloned from cDNA prepared from the Jumble mutant. Couscous<sup>lw1</sup> could not be cloned  
660 from cDNA directly (possibly because of low mRNA levels due to nonsense mediate  
661 decay or simply because of high GC content of the gene). However, the 1 bp deletion  
662 in *Couscous*<sup>lw1</sup> was confirmed by Sanger sequencing of genomic Couscous DNA. Site  
663 directed mutagenesis of the wild type gene was used to generate the mutant allele.

664 For complementation (Figure 2C,D and 3C,D), constructs were generated from a  
665 plasmid with a pUC19 backbone with a 5' *S. rosetta* elongation factor L (*efl*) promoter,  
666 monomeric teal fluorescent protein (*mTFP*), and the 3' UTR from actin (Addgene ID  
667 NK633) (Booth et al., 2018). A puromycin resistance gene was synthesized as a gene  
668 block and codon optimized for *S. rosetta*. The puromycin resistance gene (*puro*) was  
669 inserted after the *efl* promoter and separated from fluorescent reporters by self-  
670 cleaving 2A peptide from the porcine virus (P2A) (Kim et al., 2011). Copies of *jumble*,  
671 *jumble*<sup>lw1</sup>, *couscous*, and *couscous*<sup>lw1</sup> were inserted either 5' or 3' of the mTFP and  
672 separated from mTFP by a flexible linker sequence (SGGSGGS) through Gibson  
673 cloning.

674 For fluorescent localization (Figure 2E-H, Figure 2-figure supplement 3B, Figure  
675 3-figure supplement B,C), constructs were generated from a pUC19 backbone with a  
676 5' *S. rosetta* elongation factor L (*efl*) promoter, mWasabi, and 3' UTR from actin.  
677 Copies of *jumble*, *jumble*<sup>lw1</sup>, and *couscous* were inserted either 5' of the mWasabi  
678 separated by a flexible linker sequence (SGGSGGS) through Gibson cloning. Plasma  
679 membrane and ER markers from Booth et al., 2018 were used as previously described  
680 (Addgene ID NK624 and NK644).

681 ***S. rosetta* transfection and transgene expression**

682 Transfection protocol was followed as described in Booth et al., 2018  
683 (<http://www.protocols.io/groups/king-lab>). Two days prior to transfection, a culture flask  
684 (Corning, Cat. No. 353144) was seeded with Jumble, Couscous, or wild type cells at a  
685 density of 5,000 cells/ml in 200 ml of 1x HN Media. After 36-48 hr of growth, bacteria  
686 were washed away from the cells in three consecutive rounds of centrifugation and  
687 resuspension in sterile AK seawater. After the final wash, the cells were resuspended in  
688 a total volume of 100  $\mu$ l AK and counted on a Luna-FL automated cell counter (Logos  
689 Biosystems). The remaining cells were diluted to a final concentration of  $5 \times 10^7$  cells/ml  
690 and divided into 100  $\mu$ l aliquots. Each aliquot of cells pelleted at 2750 x g, resuspend in  
691 priming buffer (40 mM HEPES-KOH, pH 7.5; 34 mM Lithium Citrate; 50 mM L-Cysteine;  
692 15% (w/v) PEG 8000; and 1  $\mu$ M papain), and incubated at room temperature for 30  
693 mins to remove extracellular material coating the cells. Priming buffer was quenched  
694 with 50 mg/ml bovine serum albumin-fraction V (Sigma). Cells were pelleted at 1250 x g  
695 and resuspend in 25  $\mu$ l of SF buffer (Lonza). Each transfection reaction was prepared  
696 by adding 2  $\mu$ l of “primed” cells to a mixture of 16  $\mu$ l of SF buffer, 2  $\mu$ l of 20  $\mu$ g/ $\mu$ l  
697 pUC19; 1  $\mu$ l of 250 mM ATP, pH 7.5; 1  $\mu$ l of 100 mg/ml Sodium Heparin; and 1  $\mu$ l of  
698 each reporter DNA construct at 5  $\mu$ g/ $\mu$ l. Transfections were carried out in 96-well  
699 nucleofection plate (Lonza) in a Nucleofector 4d 96-well Nucleofection unit (Lonza) with  
700 the CM-156 pulse. Immediately after nucleofection, 100  $\mu$ l of ice-cold recovery buffer  
701 (10 mM HEPES-KOH, pH 7.5; 0.9 M Sorbitol; 8% (w/v) PEG 8000) was added to the  
702 cells and incubated for 5 min. The whole volume of the transfection reaction plus the  
703 recovery buffer was transferred to 1 ml of 1x HN media in a 12-well plate. After cells

704 recovered for 1 hr, 5  $\mu$ l of a 10 mg frozen *E. pacifica* pellet resuspend in 1 ml of AK  
705 seawater was added to each well and RIFs were added if looking at rosette induction.

## 706 **Transgenic Complementation**

707 For complementation, Jumble mutants were transfected with the following  
708 constructs: (1) *pefl-puro-P2A-Jumble-mTFP*, (2) *pefl-puro-P2A-Jumble<sup>lw1</sup>-mTFP*, (3)  
709 *pefl-puro-P2A-mTFP-Jumble*, (4) *pefl-puro-P2A-mTFP-Jumble<sup>lw1</sup>*, and (5) *pefl-puro-*  
710 *P2A-mTFP*; and Couscous with the following constructs: (1) *pefl-puro-P2A-Couscous-*  
711 *mTFP*, (2) *pefl-puro-P2A-Couscous<sup>lw1</sup>-mTFP*, (3) *pefl-puro-P2A-mTFP-Couscous*, (4)  
712 *pefl-puro-P2A-mTFP-Couscous<sup>lw1</sup>*, and (5) *pefl-puro-P2A-mTFP*. Transfected cells were  
713 grown an additional 24 hr after transfection to allow for transgene expression, and then  
714 40  $\mu$ g/ml puromycin was added for selection. Selection occurred for 48 hr before rosette  
715 induction was counted by hemocytometer. After vortexing for 15 sec and fixing with  
716 formaldehyde, 200 cells of each transfection well were counted on a hemocytometer to  
717 determine percentage of cells in rosettes (Figure 2C, Figure 3C). Complementation was  
718 repeated on 2 biological replicates with 3 technical transfection replicates each.  
719 Representative rosette images (Figure 2D, Figure 3D) were taken on by confocal  
720 microscopy using Zeiss Axio Observer LSM 880 a C-Apochromat 40x/NA1.20 W Korr  
721 UV-Vis-IR water immersion objective.

## 722 **Live cell imaging**

723 Glass-bottom dishes for live cell imaging were prepared by corona-treating and  
724 poly-D-lysine coating as described in Booth et al., 2018. Transfected cells were  
725 prepared for microscopy by pelleting 1-2 ml of cells and resuspend in 200  $\mu$ l of 4/5 ASW  
726 with 100 mM LiCl to slow flagellar beating. Cells were plated on glass-bottom dishes



727 and covered by 200  $\mu$ l of 20% (w/v) Ficoll 400 dissolved in 4/5 ASW with 100 mM LiCl.  
728 Confocal microscopy was performed on a Zeiss Axio Observer LSM 880 with an  
729 Airyscan detector and a 63x/NA1.40 Plan-Apochromatic oil immersion objective.  
730 Confocal stacks were acquired in super-resolution mode using ILEX  
731 Line scanning and two-fold averaging and the following settings: 35 nm x 35 nm pixel  
732 size, 100 nm z-step, 0.9-1.0  $\mu$ sec/pixel dwell time, 850 gain, 458 nm laser operating at  
733 1-6% laser power, 561 nm laser operating at 1-2% laser power, 458/561 nm multiple  
734 beam splitter, and 495-550 nm band-pass/570 nm long-pass filter. Images were  
735 processed using the automated Airyscan algorithm (Zeiss).

#### 736 **Lectin staining and jacalin quantification**

737 All fluorescein lectins from kits I, II, and III from Vector Lab (FLK-2100, FLK-  
738 4100, and FLK-4100) were tested for recognition in wild type, Jumbled, and Couscous  
739 (Table S5). Cells were plated on poly-D-Lysine coated wells of a 96-well glass bottom  
740 plate, lectins were added at a concentration of 1:200 and imaged immediately using  
741 Zeiss Axio Observer.Z1/7 Widefield microscope with a Hamamatsu Orca-Flash 4.0 LT  
742 CMOS Digital Camera and a 20x objective. For further jacalin image analysis (Figure 4),  
743 cells were plated on a poly-D-Lysine coated glass bottom dish, 1:400 fluorescein  
744 labelled-jacalin and 1:200 lysotracker Red DN-99 (overloaded to visualize the cell body)  
745 and were imaged immediately by confocal microscopy using Zeiss Axio Observer LSM  
746 880 a 63x/NA1.40 Plan-Apochromatic oil immersion objective. Images were taken with  
747 the following settings: 66 nm x 66 nm pixel size, 64 nm z-step, 0.34  $\mu$ sec/pixel dwell  
748 time, 488 nm laser operating at 0.2% laser power with 700 master gain, and 561 nm  
749 laser operating at 0.0175% laser power with 750 master gain. Fifteen unique fields of

750 view chosen based on lysotracker staining. Induced cells were treated with OMVs 24 hr  
751 before imaging.

752 To process images, Z-stack images were max projected using ImageJ. Individual  
753 cells were chosen based on the ability to clearly see a horizontally oriented collar by  
754 lysotracker and cropped to only include a single cell. The maximum fluorescence  
755 intensity pixel of the jacalin channel was determined for the cropped image and was  
756 used to normalize the fluorescence intensity. To measure jacalin staining around the  
757 cell body, a line was drawn using only the lysotracker staining from the point where the  
758 collar and the cell body meet on one side of the cell around the cell to the other and the  
759 fluorescence intensity was measured along the line. To compare between cells, the  
760 lines drawn around the cell body were one-dimensional interpolated in R to include 150  
761 points and normalized to the length of the line. The average fluorescence intensity was  
762 plotted over the length of the line drawn around the cell body for Jumble, Couscous, and  
763 wild type induced and uninduced with a 95% confidence interval (Figure 4F).

764 Measurements were taken from two biological replicates with at least 59 cells in total  
765 from each condition.

#### 766 **Wild type and mutant clumping assays**

767 Wild type cells transfected with the puromycin resistance gene and mWasabi  
768 separated by the P2A self-cleaving peptide under the *efl* promoter and maintained in 40  
769  $\mu\text{g/mL}$  puromycin to enrich for positive transformants. For clumping assays, equal  
770 numbers of mWasabi-wt cells either uninduced or induced to form rosettes were mixed  
771 with either Jumble or Couscous, vortexed, and plated on BSA treated 8-well glass  
772 bottom dishes. DIC and fluorescent images were obtained after 30 mins using Zeiss

773 Axio Observer.Z1/7 Widefield microscope with a Hamamatsu Orca-Flash 4.0 LT CMOS  
774 Digital Camera and a 40x/NA1.40 Plan-Apochromatic lens (Figure 1-figure supplement  
775 1).

#### 776 **Wild type and mutant growth curves**

777 All cells strains were plated at a density of  $1 \times 10^4$  cells/ml in 3 ml HN media.  
778 Every 12 hr an aliquot of cells was vortexed vigorously for 15 sec, fixed with  
779 formaldehyde, and counted by hemacytometer. Curves were generated from the  
780 average  $\pm$  SD from 2 biological replicates with 3 technical replicates each (Figure 1-  
781 figure supplement 2).

#### 782 **Jacalin Western blot**

783 Whole cell lysates were made from pelleting  $1 \times 10^7$  cells at 4C at 3,000 x g and  
784 resuspending in lysis buffer (20 mM Tris-HCl, pH 8.0; 150 mM KCl; 5 mM MgCl<sub>2</sub>; 250  
785 mM Sucrose; 1 mM DTT; 10 mM Digitonin; 1 mg/ml Sodium Heparin; 1 mM Pefabloc  
786 SC; 0.5 U/ $\mu$ l DNaseI; 1 U/ $\mu$ l SUPERaseIN). Cells were incubated in lysis buffer for 10  
787 min on ice and passed through 30G needle 5x. Insoluble material was pelleted at 6,000  
788 x g for 10 min at 4C. Lysate ( $1 \times 10^6$  cells/sample) was run on 4-20% TGX mini-gel (Bio-  
789 Rad) for 45 min at 200 V and transferred onto 0.2  $\mu$ m nitrocellulose membrane using  
790 Trans-Blot Turbo Transfer System (Bio-Rad) with semi-dry settings 25V for min. The  
791 blot was blocked for 30 min with Odyssey PBS Block (Li-cor). The blot was probed with  
792 biotinylated jacalin (1:4,000; Vector Labs) and E7 anti-tubulin antibody (1:10,000;  
793 Developmental Studies Hybridoma Bank) diluted in block for 1 hr, and then with IRDye  
794 800 streptavidin (1:1,000; Li-cor) and IRDye 700 mouse (1:1,000; Li-cor) in PBST [PBS

795 with %1 Tween 20 (v/v)]. Blot was imaged on Licor Odyssey (Figure 4-figure  
796 supplement 1).

### 797 **Rosetteless immunofluorescence staining and imaging**

798 Immunofluorescence (Figure 4-figure supplement 2) was performed previously  
799 described in Levin et al., 2014 with the modifications for better cytoskeleton  
800 preservation described in Booth et al., 2018. Two mL of dense wild type, Jumble, and  
801 Couscous cells, that were either uninduced or induced with RIFs for 24 hr, were allowed  
802 to settle on poly-L-lysine coated coverslips (BD Biosciences) for 30 min. Cells were  
803 fixed in two steps: 6% acetone in cytoskeleton buffer (10 mM MES, pH 6.1; 138 KCl, 3  
804 mM MgCl<sub>2</sub>; 2 mM EGTA; 675 mM Sucrose) for 5 and 4% formaldehyde with diluted in  
805 cytoskeleton buffer for 20 min. The coverslips were gently washed three times with  
806 cytoskeleton buffer. Cells were permeabilized with permeabilization buffer [100 mM  
807 PIPES, pH 6.95; 2 mM EGTA; 1 mM MgCl<sub>2</sub>; 1% (w/v) bovine serum albumin-fraction V;  
808 0.3% (v/v Triton X-100)] for 30 min. Cells were stained with the anti-Rosetteless  
809 genomic antibody at 3.125 ng/μl (1:400), E7 anti-tubulin antibody (1:1000;  
810 Developmental Studies Hybridoma Bank), Alexa fluor 488 anti-mouse and Alexa fluor  
811 647 anti-rabbit secondary antibodies (1:1000 each; Molecular Probes), and 6 U/ml  
812 rhodamine phalloidin (Molecular Probes) before mounting in Prolong Gold antifade  
813 reagent with DAPI (Molecular Probes).

814 Images were acquired on a Zeiss LSM 880 Airyscan confocal microscope with a  
815 63x objective (as described for live cell imaging) by frame scanning in the super-  
816 resolution mode with the following settings: 30 nm x 30 nm pixel size; 100 nm z-step;  
817 561 nm laser operating at 1.5% power with 700 master gain, and 488 nm laser

818 operating at 2.0% power with 800 master gain. Wild type rosettes were imaged with 633  
819 nm laser operating at 0.3% laser power and 650 master gain to prevent overexposure of  
820 Rosetteless, but all other conditions were operating at 2% laser power and 650 master  
821 gain in the 633 nm channel.

822

## 823 **ACKNOWLEDGEMENTS**

824 Hannah Elzinga, Lily Helfrich, and Max Coyle helped with experiments and  
825 reagent preparation. We thank Iswar Hariharan and members of the King lab for helpful  
826 discussions, research support, mutant naming suggestions, and comments on the  
827 manuscript, especially Kayley Hake, Ben Larson, Tess Linden, and Thibaut Brunet. This  
828 work used the Vincent J. Coates Genomics Sequencing Laboratory at UC Berkeley,  
829 supported by NIH S10 OD018174 Instrumentation Grant.

830

## 831 REFERENCES

- 832 Alegado RA, Brown LW, Cao S, Dermenjian RK, Zuzow R, Fairclough SR, Clardy J,  
833 King N. 2012. A bacterial sulfonolipid triggers multicellular development in the  
834 closest living relatives of animals. *eLife* **1**. doi:10.7554/eLife.00013
- 835 Bolger AM, Lohse M, Usadel B. 2014. Trimmomatic: A flexible trimmer for Illumina  
836 sequence data. *Bioinformatics* **30**:2114–2120. doi:10.1093/bioinformatics/btu170
- 837 Booth DS, Szmidt-Middleton H, King N. 2018. Choanoflagellate transfection illuminates  
838 their cell biology and the ancestry of animal septins. *bioRxiv*.  
839 doi:<https://doi.org/10.1101/343111>
- 840 Brunet T, King N. 2017. The Origin of Animal Multicellularity and Cell Differentiation.  
841 *Developmental Cell* **43**:124–140. doi:10.1016/j.devcel.2017.09.016
- 842 Cambi A, Koopman M, Figdor CG. 2005. How C-type lectins detect pathogens. *Cellular*  
843 *Microbiology* **7**:481–488. doi:10.1111/j.1462-5822.2005.00506.x
- 844 Carvalho S, Catarino TA, Dias AM, Kato M, Almeida A, Hessling B, Figueiredo J,  
845 Gartner F, Sanches JM, Ruppert T, Miyoshi E, Pierce M, Carneiro F, Kolarich D,  
846 Seruca R, Yamaguchi Y, Taniguchi N, Reis CA, Pinho SS. 2016. Preventing E-  
847 cadherin aberrant N-glycosylation at Asn-554 improves its critical function in gastric  
848 cancer. *Oncogene* **35**:1619–1631. doi:10.1038/onc.2015.225
- 849 Colin Hughes R. 1992. Lectins as cell adhesion molecules. *Current Opinion in Structural*  
850 *Biology* **2**:687–692. doi:10.1016/0959-440X(92)90202-I
- 851 Danecek P, Auton A, Abecasis G, Albers CA, Banks E, DePristo MA, Handsaker RE,  
852 Lunter G, Marth GT, Sherry ST, McVean G, Durbin R. 2011. The variant call format  
853 and VCFtools. *Bioinformatics* **27**:2156–2158. doi:10.1093/bioinformatics/btr330
- 854 Dayel MJ, Alegado RA, Fairclough SR, Levin TC, Nichols SA, McDonald K, King N.  
855 2011. Cell differentiation and morphogenesis in the colony-forming choanoflagellate  
856 *Salpingoeca rosetta*. *Developmental Biology* **357**:73–82.  
857 doi:10.1016/j.ydbio.2011.06.003
- 858 DePristo MA, Banks E, Poplin R, Garimella K V., Maguire JR, Hartl C, Philippakis AA,  
859 Del Angel G, Rivas MA, Hanna M, McKenna A, Fennell TJ, Kernytzky AM,  
860 Sivachenko AY, Cibulskis K, Gabriel SB, Altshuler D, Daly MJ. 2011. A framework  
861 for variation discovery and genotyping using next-generation DNA sequencing  
862 data. *Nature Genetics* **43**:491–501. doi:10.1038/ng.806
- 863 Doitsidou M, Poole RJ, Sarin S, Bigelow H, Hobert O. 2010. *C. elegans* mutant  
864 identification with a one-step whole-genome-sequencing and SNP mapping  
865 strategy. *PLoS ONE* **5**:1–7. doi:10.1371/journal.pone.0015435

- 866 El-Battari A. 2006. Autofluorescent Proteins for Monitoring the Intracellular Distribution  
867 of Glycosyltransferases. *Methods in Enzymology* **416**:102–120. doi:10.1016/S0076-  
868 6879(06)16007-3
- 869 Fairclough SR, Chen Z, Kramer E, Zeng Q, Young S, Robertson HM, Begovic E,  
870 Richter DJ, Russ C, Westbrook MJ, Manning G, Lang BF, Haas B, Nusbaum C,  
871 King N. 2013. Premetazoan genome evolution and the regulation of cell  
872 differentiation in the choanoflagellate *Salpingoeca rosetta*. *Genome Biology* **14**:1–  
873 15. doi:10.1186/gb-2013-14-2-r15
- 874 Fairclough SR, Dayel MJ, King N. 2010. Multicellular development in a choanoflagellate.  
875 *Current Biology* **20**:875–876. doi:10.1016/j.cub.2010.09.014
- 876 Finn RD, Attwood TK, Babbitt PC, Bateman A, Bork P, Bridge AJ, Chang HY, Dosztanyi  
877 Z, El-Gebali S, Fraser M, Gough J, Haft D, Holliday GL, Huang H, Huang X, Letunic  
878 I, Lopez R, Lu S, Marchler-Bauer A, Mi H, Mistry J, Natale DA, Necci M, Nuka G,  
879 Orengo CA, Park Y, Pesseat S, Piovesan D, Potter SC, Rawlings ND, Redaschi N,  
880 Richardson L, Rivoire C, Sangrador-Vegas A, Sigrist C, Sillitoe I, Smithers B,  
881 Squizzato S, Sutton G, Thanki N, Thomas PD, Tosatto SCE, Wu CH, Xenarios I,  
882 Yeh LS, Young SY, Mitchell AL. 2017. InterPro in 2017-beyond protein family and  
883 domain annotations. *Nucleic Acids Research* **45**:D190–D199.  
884 doi:10.1093/nar/gkw1107
- 885 Finn RD, Coggill P, Eberhardt RY, Eddy SR, Mistry J, Mitchell AL, Potter SC, Punta M,  
886 Qureshi M, Sangrador-Vegas A, Salazar GA, Tate J, Bateman A. 2016. The Pfam  
887 protein families database: Towards a more sustainable future. *Nucleic Acids*  
888 *Research* **44**:D279–D285. doi:10.1093/nar/gkv1344
- 889 Geijtenbeek TBH, Gringhuis SI. 2009. Signalling through C-type lectin receptors:  
890 shaping immune responses. *Nature Reviews Immunology* **9**:465–479.  
891 doi:10.1038/nri2569
- 892 Gilbert OM, Foster KR, Mehdiabadi NJ, Strassmann JE, Queller DC. 2007. High  
893 relatedness maintains multicellular cooperation in a social amoeba by controlling  
894 cheater mutants. *Proceedings of the National Academy of Sciences* **104**:8913–  
895 8917. doi:10.1073/pnas.0702723104
- 896 Granovsky M, Fata J, Pawling J, Muller WJ, Khokha R, Dennis JW. 2000. Suppression  
897 of tumor growth and metastasis in Mgat5-deficient mice. *Nature Medicine* **6**:306–  
898 312. doi:10.1038/73163
- 899 Guo HB, Johnson H, Randolph M, Pierce M. 2009. Regulation of homotypic cell-cell  
900 adhesion by branched N-glycosylation of N-cadherin extracellular EC2 and EC3  
901 domains. *Journal of Biological Chemistry* **284**:34986–34997.  
902 doi:10.1074/jbc.M109.060806
- 903 Herron MD, Borin JM, Boswell JC, Walker J, Chen I-CK, Knox CA, Boyd M,  
904 Rosenzweig F, Ratcliff WC. 2018. De novo origin of multicellularity in response to

- 905 predation. *bioRxiv* 247361. doi:10.1101/247361
- 906 Hirohashi S, Kanai Y. 2003. Cell adhesion system and human cancer morphogenesis.  
907 *Cancer Science* **94**:575–581. doi:10.1111/j.1349-7006.2003.tb01485.x
- 908 Ho DH, Badellino K, Baglia FA, Walsh PN. 1998. A Binding Site for Heparin in the Apple  
909 3 Domain of Factor XI. *Journal of Biological Chemistry* **273**:16382–16390.
- 910 Kelly LA, Mezulis S, Yates C, Wass M, Sternberg M. 2015. The Phyre2 web portal for  
911 protein modelling, prediction, and analysis. *Nature Protocols* **10**:845–858.  
912 doi:10.1038/nprot.2015-053
- 913 Kim JH, Lee SR, Li LH, Park HJ, Park JH, Lee KY, Kim MK, Shin BA, Choi SY. 2011.  
914 High cleavage efficiency of a 2A peptide derived from porcine teschovirus-1 in  
915 human cell lines, zebrafish and mice. *PLoS ONE* **6**:1–8.  
916 doi:10.1371/journal.pone.0018556
- 917 King N, Westbrook MJ, Young SL, Kuo A, Abedin M, Chapman J, Fairclough S, Hellsten  
918 U, Isogai Y, Letunic I, Marr M, Pincus D, Putnam N, Rokas A, Wright KJ, Zuzow R,  
919 Dirks W, Good M, Goodstein D, Lemons D, Li W, Lyons JB, Morris A, Nichols S,  
920 Richter DJ, Salamov A, Bork P, Lim WA, Manning G, Miller WT, McGinnis W,  
921 Shapiro H, Tjian R, Grigoriev I V., Rokhsar D, Sequencing JGI, Bork P, Lim WA,  
922 Manning G, Miller WT, McGinnis W, Shapiro H, Tjian R, Grigoriev I V., Rokhsar D.  
923 2008. The genome of the choanoflagellate *Monosiga brevicollis* and the origin of  
924 metazoans. *Nature* **451**:783–8. doi:10.1038/nature06617
- 925 Kopito RR. 1997. ER quality control: the cytoplasmic connection. *Cell* **88**:427–30.  
926 doi:10.1016/S0092-8674(00)81881-4
- 927 Kuzdzal-Fick JJ, Fox SA, Strassman JE, Queller DC. 2011. High Relatedness Is  
928 Necessary and Sufficient to Maintain Multicellularity in *Dictyostelium*. *Science*  
929 **334**:1548–1551. doi:10.3334/ORNLDAAAC/797
- 930 Lairson LL, Henrissat B, Davies GJ, Withers SG. 2008. Glycosyltransferases:  
931 Structures, Functions, and Mechanisms. *Annual Review of Biochemistry* **77**:521–  
932 555. doi:10.1146/annurev.biochem.76.061005.092322
- 933 Larkin MA, Blackshields G, Brown NP, Chenna R, Mcgettigan PA, McWilliam H,  
934 Valentin F, Wallace IM, Wilm A, Lopez R, Thompson JD, Gibson TJ, Higgins DG.  
935 2007. Clustal W and Clustal X version 2.0. *Bioinformatics* **23**:2947–2948.  
936 doi:10.1093/bioinformatics/btm404
- 937 Larsen ISB, Narimatsu Y, Joshi HJ, Siukstaite L, Harrison OJ, Brasch J, Goodman KM,  
938 Hansen L, Shapiro L, Honig B, Vakhrushev SY, Clausen H, Halim A. 2017.  
939 Discovery of an O-mannosylation pathway selectively serving cadherins and  
940 protocadherins. *Proceedings of the National Academy of Sciences* **114**:201708319.  
941 doi:10.1073/pnas.1708319114



- 942 Leadbeater BS. 2015. The choanoflagellates: evolution, biology, and ecology, 1st ed.  
943 Cambridge: Cambridge University Press.
- 944 Leigh EG, Smith JM, Szathmary E. 1995. The Major Transitions of Evolution. *Evolution*  
945 **49**:1302. doi:10.2307/2410462
- 946 Leshchiner I, Alexa K, Kelsey P, Adzhubei I, Austin-Tse CA, Cooney JD, Anderson H,  
947 King MJ, Stottmann RW, Garnaas MK, Ha S, Drummond IA, Paw BH, North TE,  
948 Beier DR, Goessling W, Sunyaev SR. 2012. Mutation mapping and identification by  
949 whole-genome sequencing. *Genome Research* **22**:1541–1548.  
950 doi:10.1101/gr.135541.111
- 951 Levin TC, Greaney AJ, Wetzel L, King N. 2014. The Rosetteless gene controls  
952 development in the choanoflagellate *S. rosetta*. *eLife* **3**:e04070.  
953 doi:10.7554/eLife.04070
- 954 Levin TC, King N. 2013. Evidence for Sex and Recombination in the Choanoflagellate  
955 *Salpingoeca rosetta*. *Current Biology* **23**:2176–2180. doi:10.1016/j.cub.2013.08.061
- 956 Li H, Durbin R. 2009. Fast and accurate short read alignment with Burrows-Wheeler  
957 transform. *Bioinformatics* **25**:1754–1760. doi:10.1093/bioinformatics/btp324
- 958 Li H, Handsaker B, Wysoker A, Fennell T, Ruan J, Homer N, Marth G, Abecasis G,  
959 Durbin R. 2009. The Sequence Alignment/Map format and SAMtools.  
960 *Bioinformatics* **25**:2078–2079. doi:10.1093/bioinformatics/btp352
- 961 Lister R, Gregory BD, Ecker JR. 2009. Next is now: new technologies for sequencing of  
962 genomes, transcriptomes, and beyond. *Current Opinion in Plant Biology* **12**:107–  
963 118. doi:10.1016/j.pbi.2008.11.004
- 964 Marchler-Bauer A, Bo Y, Han L, He J, Lanczycki CJ, Lu S, Chitsaz F, Derbyshire MK,  
965 Geer RC, Gonzales NR, Gwadz M, Hurwitz DI, Lu F, Marchler GH, Song JS,  
966 Thanki N, Wang Z, Yamashita RA, Zhang D, Zheng C, Geer LY, Bryant SH. 2017.  
967 CDD/SPARCLE: Functional classification of proteins via subfamily domain  
968 architectures. *Nucleic Acids Research* **45**:D200–D203. doi:10.1093/nar/gkw1129
- 969 Müller WE, Zahn RK, Kurelec B, Müller I, Uhlenbruck G, Vaith P. 1979. Aggregation of  
970 sponge cells. *Journal of Biological Chemistry* **254**:1280–1287.
- 971 Nedashkovskaya OI, Kim SB, Vancanneyt M, Lysenko AM, Shin DS, Park MS, Lee KH,  
972 Jung WJ, Kalinovskaya NI, Mikhailov V V., Bae KS, Swings J. 2006. *Echinicola*  
973 *pacifica* gen. nov., sp. nov., a novel flexibacterium isolated from the sea urchin  
974 *Strongylocentrotus intermedius*. *International Journal of Systematic and*  
975 *Evolutionary Microbiology* **56**:953–958. doi:10.1099/ijs.0.64156-0
- 976 Nichols SA, Roberts BW, Richter DJ, Fairclough SR, King N. 2012. Origin of metazoan  
977 cadherin diversity and the antiquity of the classical cadherin/ $\beta$ -catenin complex.  
978 *Proceedings of the National Academy of Sciences* **109**:13046–51.

- 979           doi:10.1073/pnas.1120685109
- 980 Pomraning KR, Smith KM, Freitag M. 2011. Bulk segregant analysis followed by high-  
981 throughput sequencing reveals the *Neurospora* cell cycle gene, *ndc-1*, to be allelic  
982 with the gene for ornithine decarboxylase, *spe-1*. *Eukaryotic Cell* **10**:724–733.  
983 doi:10.1128/EC.00016-11
- 984 Ratcliff WC, Denison RF, Borrello M, Travisano M. 2012. Experimental evolution of  
985 multicellularity. *Proceedings of the National Academy of Sciences* **109**:1595–1600.  
986 doi:10.1073/pnas.1115323109
- 987 Ratcliff WC, Herron MD, Howell K, Pentz JT, Rosenzweig F, Travisano M. 2013.  
988 Experimental evolution of an alternating uni- and multicellular life cycle in  
989 *Chlamydomonas reinhardtii*. *Nature Communications* **4**:1–7.  
990 doi:10.1038/ncomms3742
- 991 Rayner JC, Munro S. 1998. Identification of the MNN2 and MNN5  
992 mannosyltransferases required for forming and extending the mannose branches of  
993 the outer chain mannans of *Saccharomyces cerevisiae*. *Journal of Biological*  
994 *Chemistry* **273**:26836–26843. doi:10.1074/jbc.273.41.26836
- 995 Richter DJ, Fozouni P, Eisen MB, King N. 2018. Gene family innovation, conservation  
996 and loss on the animal stem lineage. *eLife* **7**. doi:10.7554/eLife.34226
- 997 Ruiz-Trillo I, Roger AJ, Burger G, Gray MW, Lang BF. 2008. A phylogenomic  
998 investigation into the origin of Metazoa. *Molecular Biology and Evolution* **25**:664–  
999 672. doi:10.1093/molbev/msn006
- 1000 Ruoslahti E. 1996. Brain extracellular matrix. *Glycobiology* **6**:489–492.  
1001 doi:<https://doi.org/10.1093/glycob/6.5.489>
- 1002 Sawaguchi S, Varshney S, Ogawa M, Sakaidani Y, Yagi H, Takeshita K, Murohara T,  
1003 Kato K, Sundaram S, Stanley P, Okajima T. 2017. O-GlcNAc on NOTCH1 EGF  
1004 repeats regulates ligand-induced Notch signaling and vascular development in  
1005 mammals. *eLife* **6**. doi:10.7554/eLife.24419
- 1006 Schalchian-Tabrizi K, Minge MA, Espelund M, Orr R, Ruden T, Jakobsen KS, Cavalier-  
1007 Smith T. 2008. Multigene phylogeny of Choanozoa and the origin of animals. *PLoS*  
1008 *ONE* **3**. doi:10.1371/journal.pone.0002098
- 1009 Schneeberger K, Ossowski S, Lanz C, Juul T, Petersen AH, Nielsen KL, Jørgensen JE,  
1010 Weigel D, Andersen SU. 2009. SHOREmap: Simultaneous mapping and mutation  
1011 identification by deep sequencing. *Nature Methods* **6**:550–551.  
1012 doi:10.1038/nmeth0809-550
- 1013 Sebé-Pedrós A, Degnan BM, Ruiz-Trillo I. 2017. The origin of Metazoa: a unicellular  
1014 perspective. *Nature Reviews Genetics* **18**:498–512. doi:10.1038/nrg.2017.21

- 1015 Strahl-Bolsinger S, Gentzsch M, Tanner W. 1999. Protein O-mannosylation. *Biochimica*  
1016 *et Biophysica Acta - General Subjects* **1426**:297–307. doi:10.1016/S0304-  
1017 4165(98)00131-7
- 1018 Stratford M. 1992. Yeast Flocculation : Receptor Definition by mnn Mutants and  
1019 Concanavalin A. *Yeast* **8**:635–645.
- 1020 Švajger U, Anderluh M, Jeras M, Obermajer N. 2010. C-type lectin DC-SIGN: An  
1021 adhesion, signalling and antigen-uptake molecule that guides dendritic cells in  
1022 immunity. *Cellular Signalling* **22**:1397–1405. doi:10.1016/J.CELLSIG.2010.03.018
- 1023 Tordai H, Bányai L, Patthy L. 1999. The PAN module: The N-terminal domains of  
1024 plasminogen and hepatocyte growth factor are homologous with the apple domains  
1025 of the prekallikrein family and with a novel domain found in numerous nematode  
1026 proteins. *FEBS Letters* **461**:63–67. doi:10.1016/S0014-5793(99)01416-7
- 1027 Tu L, Banfield DK. 2010. Localization of Golgi-resident glycosyltransferases. *Cellular*  
1028 *and Molecular Life Sciences* **67**:29–41. doi:10.1007/s00018-009-0126-z
- 1029 Voz ML, Coppieters W, Manfroid I, Baudhuin A, von Berg V, Charlier C, Meyer D,  
1030 Driever W, Martial JA, Peers B. 2012. Fast homozygosity mapping and  
1031 identification of a zebrafish enu-induced mutation by whole-genome sequencing.  
1032 *PLoS ONE* **7**:1–10. doi:10.1371/journal.pone.0034671
- 1033 Wenger JW, Schwartz K, Sherlock G. 2010. Bulk segregant analysis by high-throughput  
1034 sequencing reveals a novel xylose utilization gene from *Saccharomyces cerevisiae*.  
1035 *PLoS Genetics* **6**:18. doi:10.1371/journal.pgen.1000942
- 1036 Wiggins C a, Munro S. 1998. Activity of the yeast MNN1 alpha-1,3-mannosyltransferase  
1037 requires a motif conserved in many other families of glycosyltransferases.  
1038 *Proceedings of the National Academy of Sciences of the United States of America*  
1039 **95**:7945–7950. doi:10.1073/pnas.95.14.7945
- 1040 Woznica A, Cantley AM, Beemelmans C, Freinkman E, Clardy J, King N. 2016.  
1041 Bacterial lipids activate, synergize, and inhibit a developmental switch in  
1042 choanoflagellates. *Proceedings of the National Academy of Sciences* **113**:7894–  
1043 7899. doi:10.1073/pnas.1605015113
- 1044 Woznica A, Gerdt JP, Hulett RE, Clardy J, King N. 2017. Mating in the Closest Living  
1045 Relatives of Animals Is Induced by a Bacterial Chondroitinase. *Cell* **170**:1175–  
1046 1183.e11. doi:10.1016/j.cell.2017.08.005
- 1047 Zelensky AN, Gready JE. 2005. The C-type lectin-like domain superfamily. *FEBS*  
1048 *Journal* **272**:6179–6217. doi:10.1111/j.1742-4658.2005.05031.x
- 1049 Zhang L, Zhang Y, Ten Hagen KG. 2008. A mucin-type O-glycosyltransferase  
1050 modulates cell adhesion during *Drosophila* development. *Journal of Biological*  
1051 *Chemistry* **283**:34076–34086. doi:10.1074/jbc.M804267200

- 1052 Zhao Y, Sato Y, Isaji T, Fukuda T, Matsumoto A, Miyoshi E, Gu J, Taniguchi N. 2008.  
1053 Branched N-glycans regulate the biological functions of integrins and cadherins.  
1054 *FEBS Journal* **275**:1939–1948. doi:10.1111/j.1742-4658.2008.06346.x
- 1055 Zimmermann L, Stephens A, Nam SZ, Rau D, Kübler J, Lozajic M, Gabler F, Söding J,  
1056 Lupas AN, Alva V. 2017. A Completely Reimplemented MPI Bioinformatics Toolkit  
1057 with a New HHpred Server at its Core. *Journal of Molecular Biology* **430**:2237–  
1058 2243. doi:10.1016/j.jmb.2017.12.007
- 1059  
1060

1061 **FIGURE LEGENDS**

1062 **Figure 1. Mutant cells aggregate and fail to form rosettes. (A)** Wild type cells are  
1063 unicellular or form linear chains in the absence of rosette inducing factors (RIFs) and  
1064 develop into organized spherical rosettes. Rosettes are resistant to shear force and  
1065 survive vortexing. Four class C mutants — Seafoam, Soapsuds, Couscous, and Jumble  
1066 — form disordered clumps of cells in the presence and absence of RIFs. The clumps  
1067 are not resistant to vortexing and fall apart into single cells. **(B)** Class C mutants do not  
1068 form any detectable rosettes. Rosette development was measured as the % of cells in  
1069 rosettes after 48 hr in the presence of RIFs and is shown as mean  $\pm$  SEM. n.d. = no  
1070 detected rosettes. **(C)** Class C mutants quickly aggregated into large clumps after  
1071 disruption by vortexing. After vortexing, wild type and mutant cells were incubated for 30  
1072 minutes in the absence of RIFs and clump sizes were quantified by automated image  
1073 analysis. Data are presented as violin boxplots, showing the median cell number  
1074 (middle line), interquartile range (white box), and range excluding outliers (thin line). All  
1075 mutants had significantly larger masses of cells (two-tailed t-test \*\*\*\* $p < 0.0001$ ) than  
1076 found in cultures of wild type cells. **(D)** Clumping occurred within minutes after vortexing  
1077 in the Class C mutants without RIFs, revealing that the clumps form by aggregation and  
1078 not through cell division. DIC images obtained at 0, 15, and 30 minutes post-vortexing.  
1079 Scale bar = 20  $\mu$ m.

1080

1081 **Figure 2. Jumble maps to a predicted glycosyltransferase that localizes to the**  
1082 **Golgi apparatus. (A)** Jumble has a predicted transmembrane domain (marked TM) and  
1083 secondary structure (alpha helices marked by black rectangles). Structural homology

1084 algorithms predict that Jumble is related to well-characterized glycosyltransferases  
1085 (Figure 2-figure supplement 2). The mutant gene has a T to C mutation at nucleotide  
1086 1109 that causes an amino acid substitution of proline to leucine at amino acid position  
1087 305. **(B)** A backcross of a mutant F1 progeny to the Mapping Strain yielded nine  
1088 rosette-forming F2 isolates with the wild type T allele and twelve clumpy F2 isolates with  
1089 the *jumble<sup>lw1</sup>* C allele. The inheritance significantly deviated from expected Mendelian  
1090 inheritance of unlinked traits and confirmed the tight linkage between the *jumble<sup>lw1</sup>* allele  
1091 to the clumpy, rosetteless phenotype.  $X^2$  = Chi-squared value, d.f. = degrees of  
1092 freedom. **(C,D)** Transgenic expression of *jumble-mTFP* and *mTFP-jumble* rescued  
1093 rosette development in the Jumble mutant, but *jumble<sup>lw1</sup>-mTFP*, *mTFP-jumble<sup>lw1</sup>*, or  
1094 *mTFP* did not. RIFs were added immediately after transfection and 40 µg/mL puromycin  
1095 was added 24 hours post-transfection to select for transformants. **(C)** Rosette  
1096 development was measured as the % of cells in rosettes 72 hr post-transfection and  
1097 shown as mean ± SD. n.d. = no detected rosettes. (n=200 cells counted from each of 3  
1098 technical replicates; 2 biological replicates). **(D)** Rosettes transgenically complemented  
1099 with *jumble-mTFP* in the Jumble mutant appeared phenotypically wild type and most  
1100 cells in rosettes had detectable fluorescent expression at the apical base of the cell.  
1101 Representative rosette shown. **(E-H)** To examine localization, Jumble-mWasabi or  
1102 Jumble<sup>lw1</sup>-mWasabi (cyan) under the *efl* promoter were co-expressed with membrane  
1103 marker-mCherry (magenta) in wild type *S. rosetta*. Jumble-mWasabi localizes to the  
1104 apical pole of cells grown **(E)** without RIFs or **(G)** with RIFs, consistent with the  
1105 localization of the Golgi apparatus. When expressed in otherwise wild type cells grown  
1106 **(F)** without RIFs or **(H)** with RIFs, the mutant Jumble<sup>lw1</sup>-mWasabi incorrectly localizes to

1107 the ER and food vacuole. Boxes indicate the inferred location of the Golgi apparatus at  
1108 the apical pole of the cell. The food vacuole (asterisk) was often visualized due to  
1109 autofluorescence from ingested bacteria or through accumulation of the fluorescent  
1110 markers in the food vacuole, perhaps through autophagy. For reference, arrows indicate  
1111 the base of the flagellum although the flagellum may not be visible in the plane of focus  
1112 shown. Scale bar = 5  $\mu$ m.

1113

1114 **Figure 3. Couscous maps to a predicted mannosyltransferase with a PAN/Apple**

1115 **domain. (A)** Couscous has a predicted signal sequence (S), a PAN/Apple domain  
1116 (PAN), and a mannosyltransferase domain. The causative lesion is a 1-base pair

1117 deletion at nucleotide position 2447 that causes a frameshift at amino acid 728,

1118 resulting in 75 amino acids that do not align between the wild type and mutant (Cous)

1119 sequences, and an early stop codon (\*) at amino acid 803. **(B)** Independent

1120 backcrosses of two individual mutant F1 progeny to the Mapping Strain yielded 38

1121 rosette-forming F2 isolates with the wild type GCCC allele and 51 clumpy F2 isolates

1122 with the *couscous*<sup>lw1</sup> GCC allele. The inheritance significantly deviated from expected

1123 Mendelian inheritance of unlinked traits and confirmed the tight linkage between the

1124 *couscous*<sup>lw1</sup> allele to the clumpy, rosetteless phenotype.  $X^2$  = Chi-squared value, d.f. =

1125 degrees of freedom. **(C, D)** Rosette formation in Couscous mutant cells can be rescued

1126 by transgenic expression of *couscous-mTFP* or *mTFP-couscous*, but not *couscous*<sup>lw1</sup>-

1127 *mTFP*, *mTFP-couscous*<sup>lw1</sup>, or *mTFP* alone. RIFs were added immediately after

1128 transfection and 40  $\mu$ g/mL puromycin was added 24 hours post-transfection to select for

1129 positive transformants. **(C)** Rosette development (mean  $\pm$  SD) was measured as the %

1130 of cells in rosettes 72 hr after transfection and treatment with RIFs . n.d. = no detected  
1131 rosettes. (n=200 cells counted from each of 3 technical replicates; 2 biological  
1132 replicates). **(D)** Rosettes transgenically complemented with *couscous-mTFP* in the  
1133 Couscous mutant appeared phenotypically wild type. Representative rosette shown.  
1134 Scale bar = 5  $\mu$ m.  
1135  
1136 **Figure 4. Disruption of basal glycosylation patterns in Jumble and Couscous**  
1137 **mutants.** FITC-labelled jacalin binds the apical and basal poles of wild type single cells  
1138 **(B)** and becomes enriched in the ECM in the center of rosettes **(A, B'** boxed region from  
1139 **A)**. Although FITC-jacalin staining appeared normal at the apical poles of Jumble **(C)**  
1140 and Couscous **(D)** mutant cells, FITC-jacalin staining at the basal poles of cells was  
1141 undetectable in cells grown either in the absence (-RIFs; **C, D)** or presence (+RIFs; **C',**  
1142 **D')** RIFs. Arrows mark the apical pole and arrowheads mark the basal pole. **(E)** Cartoon  
1143 depicts how jacalin fluorescence was measured. Starting with micrographs of FITC-  
1144 jacalin stained cells, a line was drawn tracing from one edge of the collar around the cell  
1145 body to the other edge of the collar, and the underlying fluorescent signal was  
1146 normalized for cell size and background intensity. **(F)** The average normalized  
1147 fluorescence intensity of jacalin measured in at least 59 cells for each condition was  
1148 graphed against the normalized length of the cell body (n=2 biological replicates).  
1149 Jumble and Couscous -/+RIFs have reduced jacalin binding at the basal pole compared  
1150 to wild type -/+RIFs. Gray shadows indicate 95% confidence intervals. Scale bar = 5  
1151  $\mu$ m.  
1152



1153 **Figure 5. Model for promiscuous clumping in rosette defective Class C mutants.**

1154 Wild type *S. rosetta* has a glycosylated basal patch of ECM (red) as marked by the  
1155 lectin jacalin that becomes enriched during the course of rosette formation. The  
1156 Rosetteless protein, required for rosette formation and speculated to play a structural  
1157 role in holding rosettes together, localizes to the same location on the basal pole of cells  
1158 and becomes similarly enriched as rosette form. Mutants lack the glycosylated basal  
1159 patch of jacalin staining. The altered cell surface could lead to clumping, either through  
1160 mis-regulation of cell adhesion molecules or exposure of a normally masked adhesive  
1161 cell surface. The same alteration that allows clumping of Class C mutants also prevents  
1162 rosette development, perhaps by disrupting glycan modification on the Rosetteless  
1163 protein or one of its interaction partners.

# Figure 1

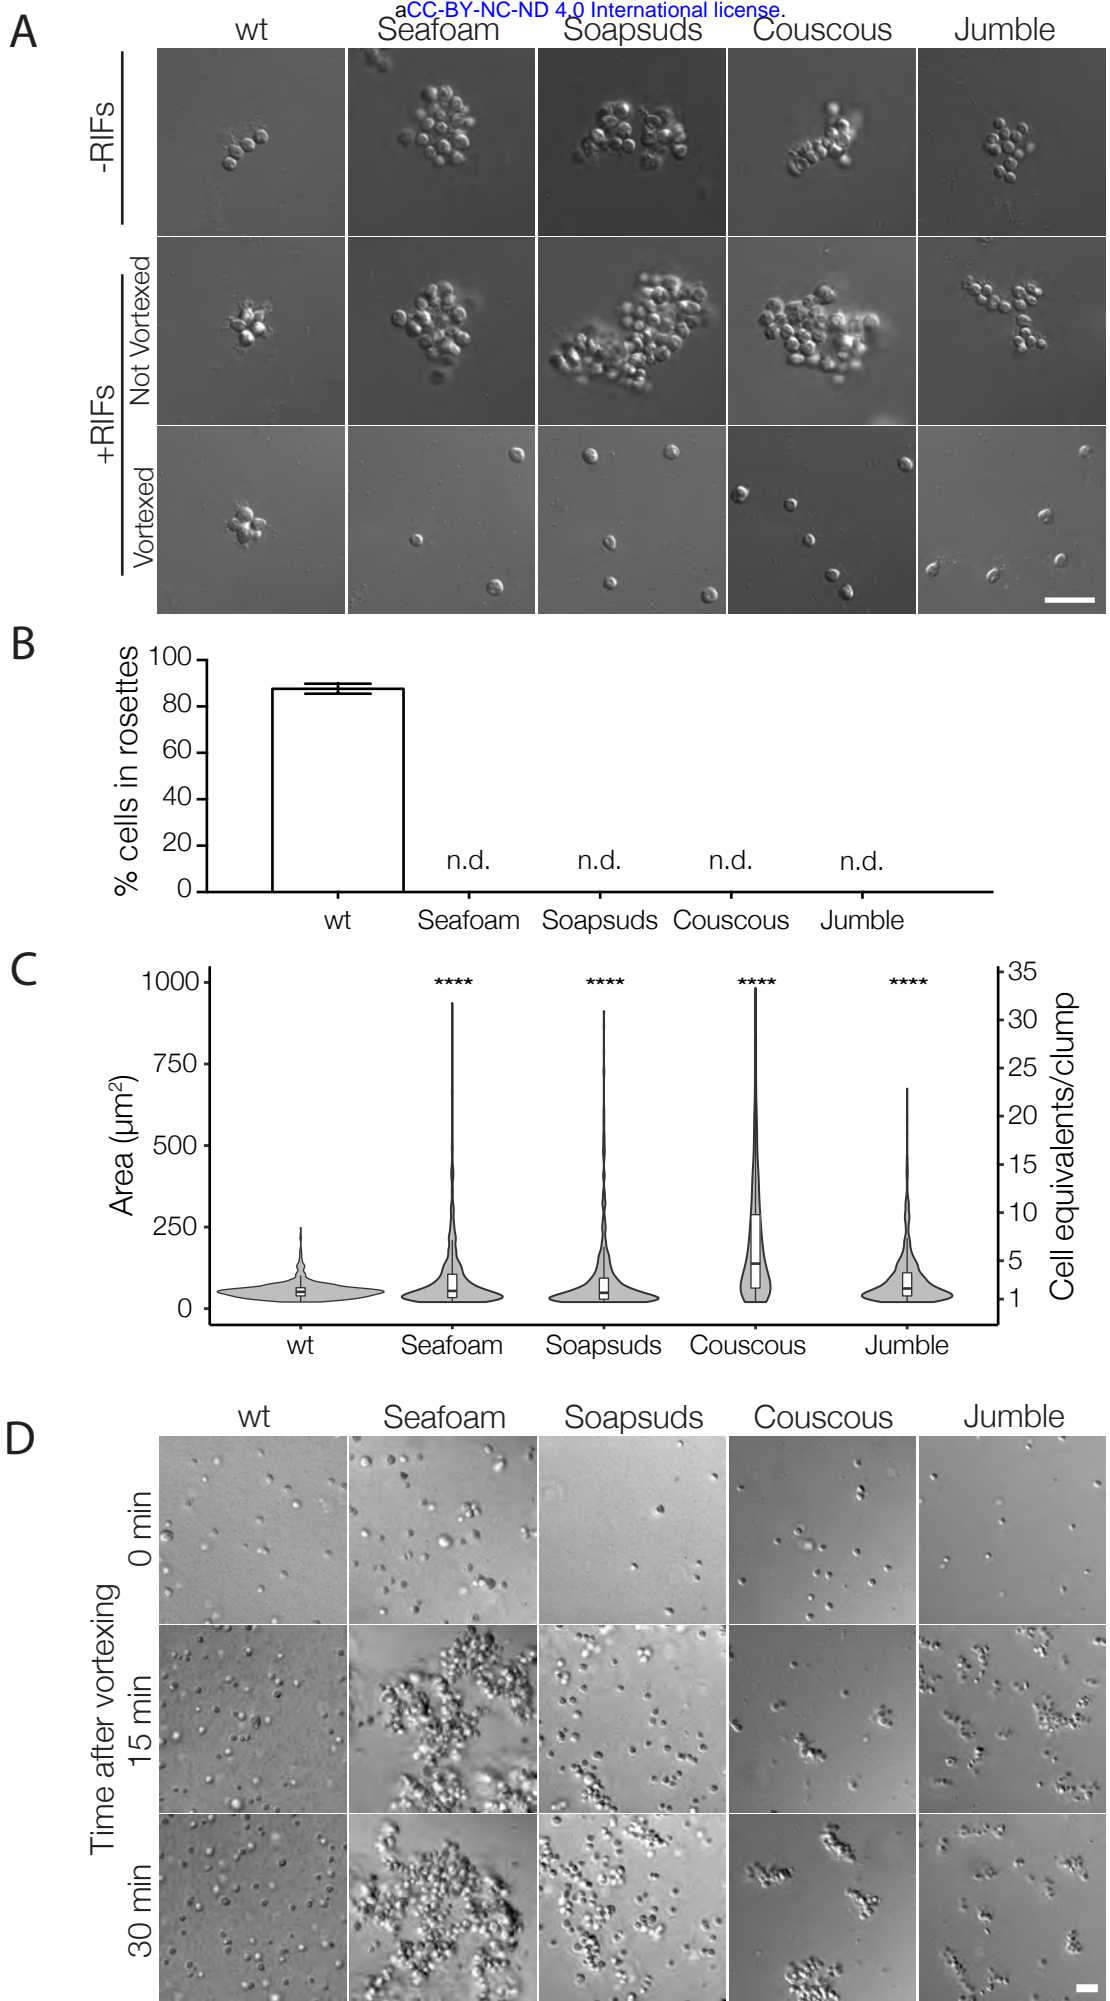

# Figure 2

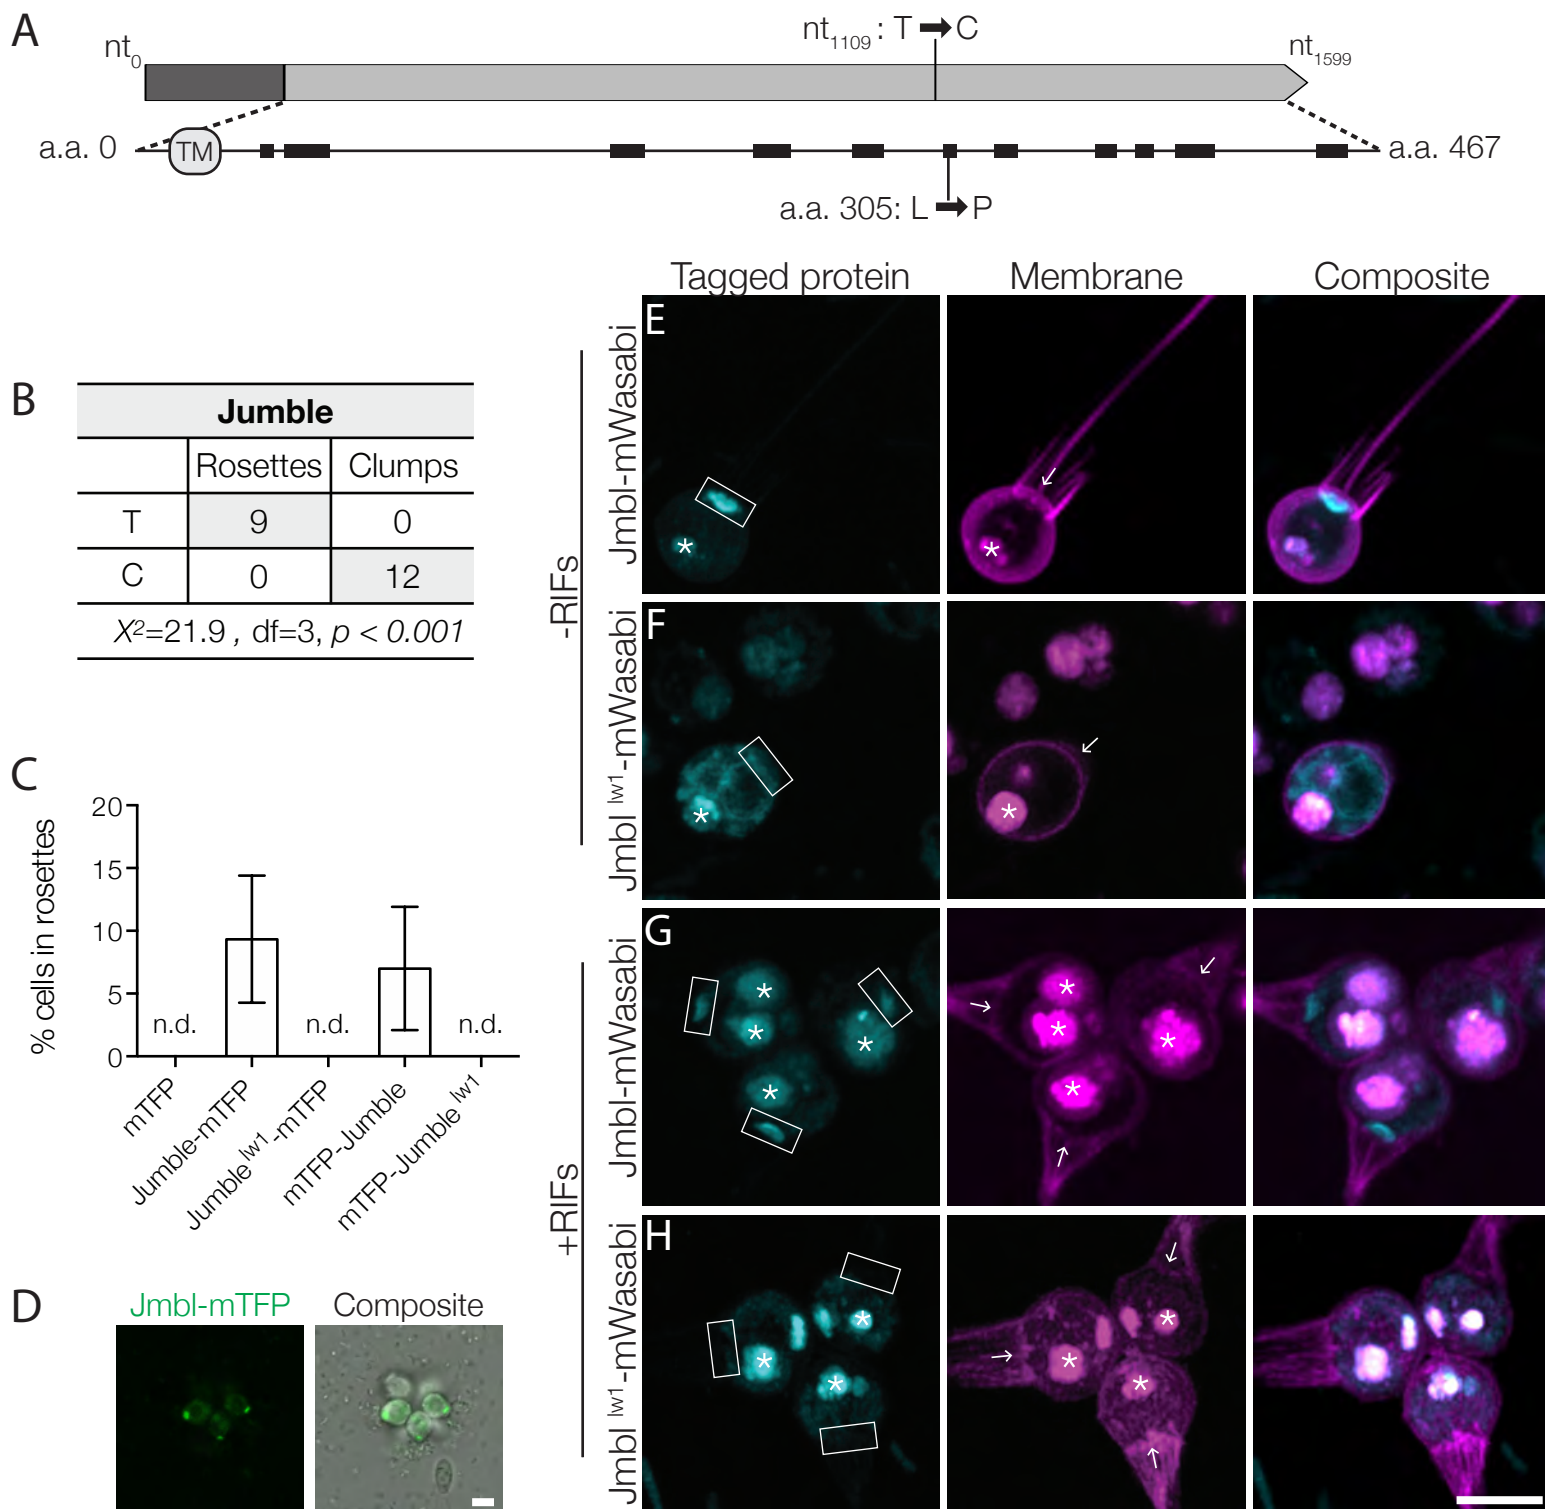

# Figure 3

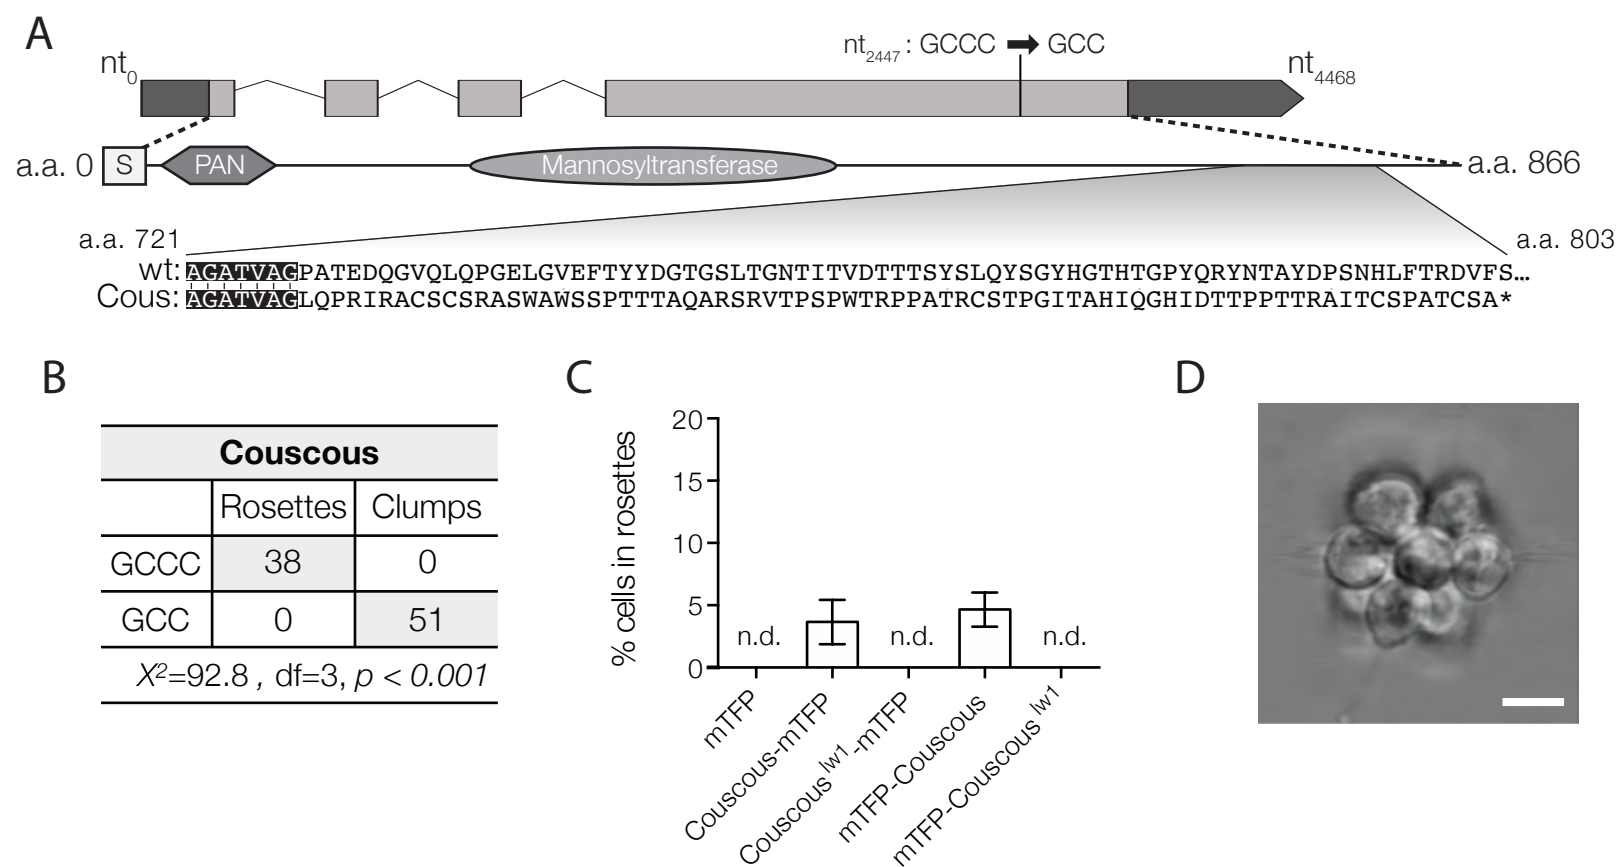

# Figure 4

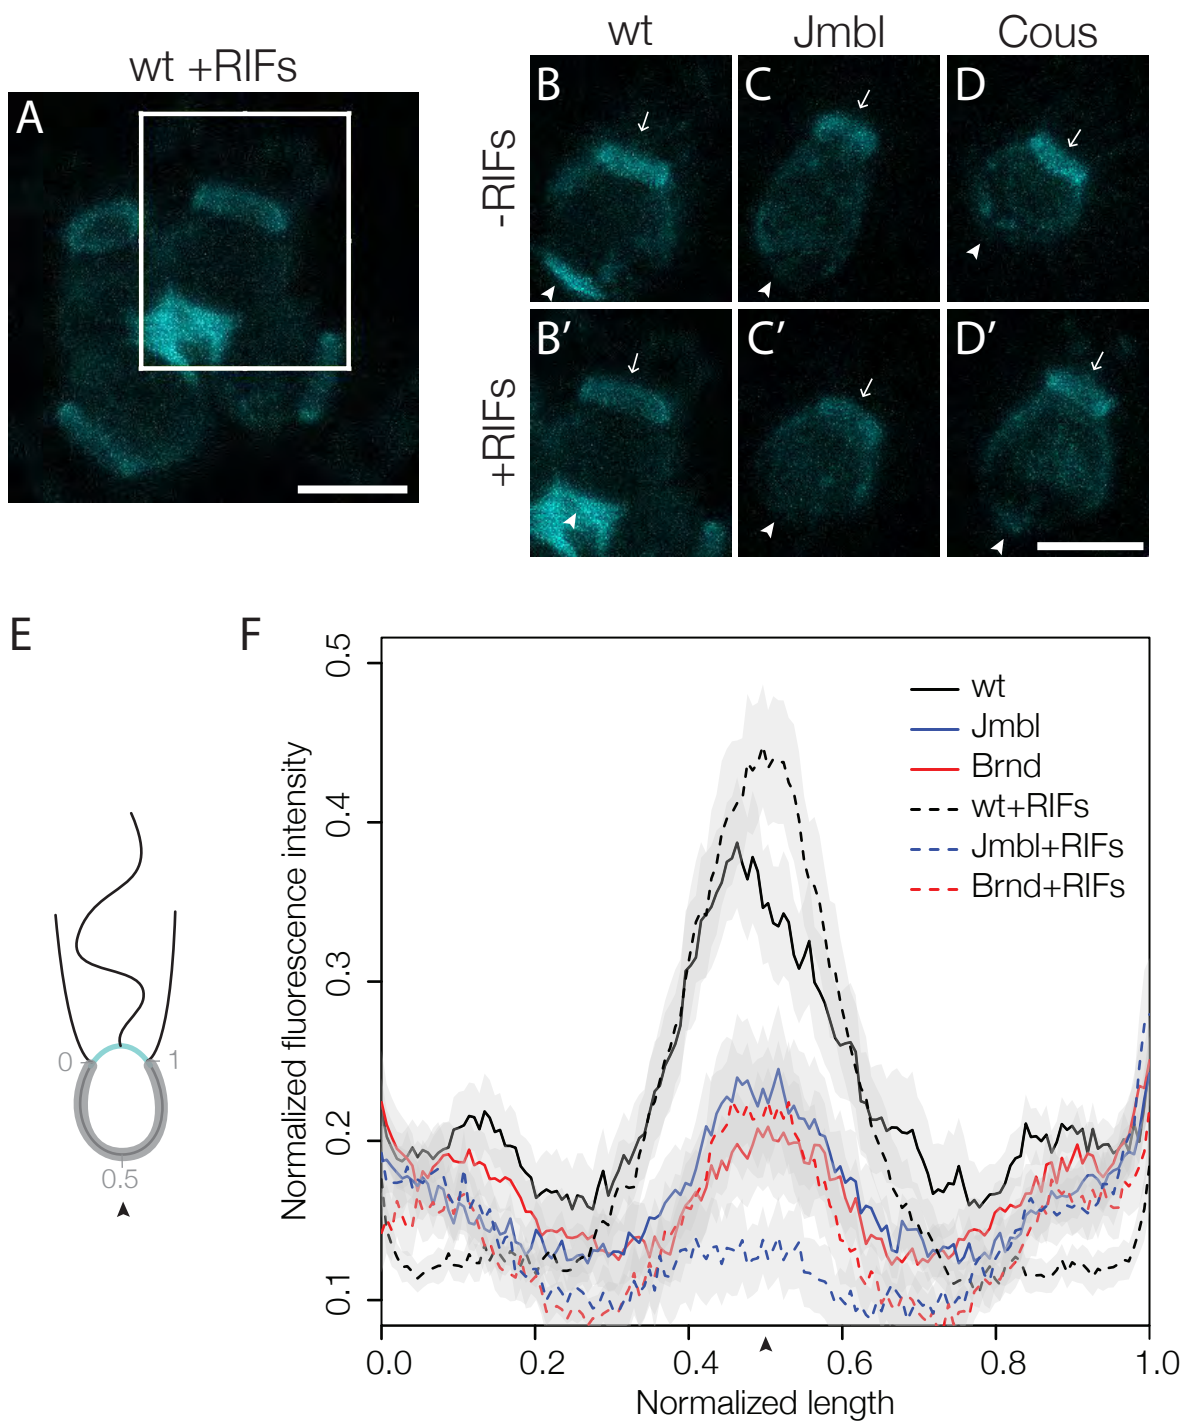

# Figure 5

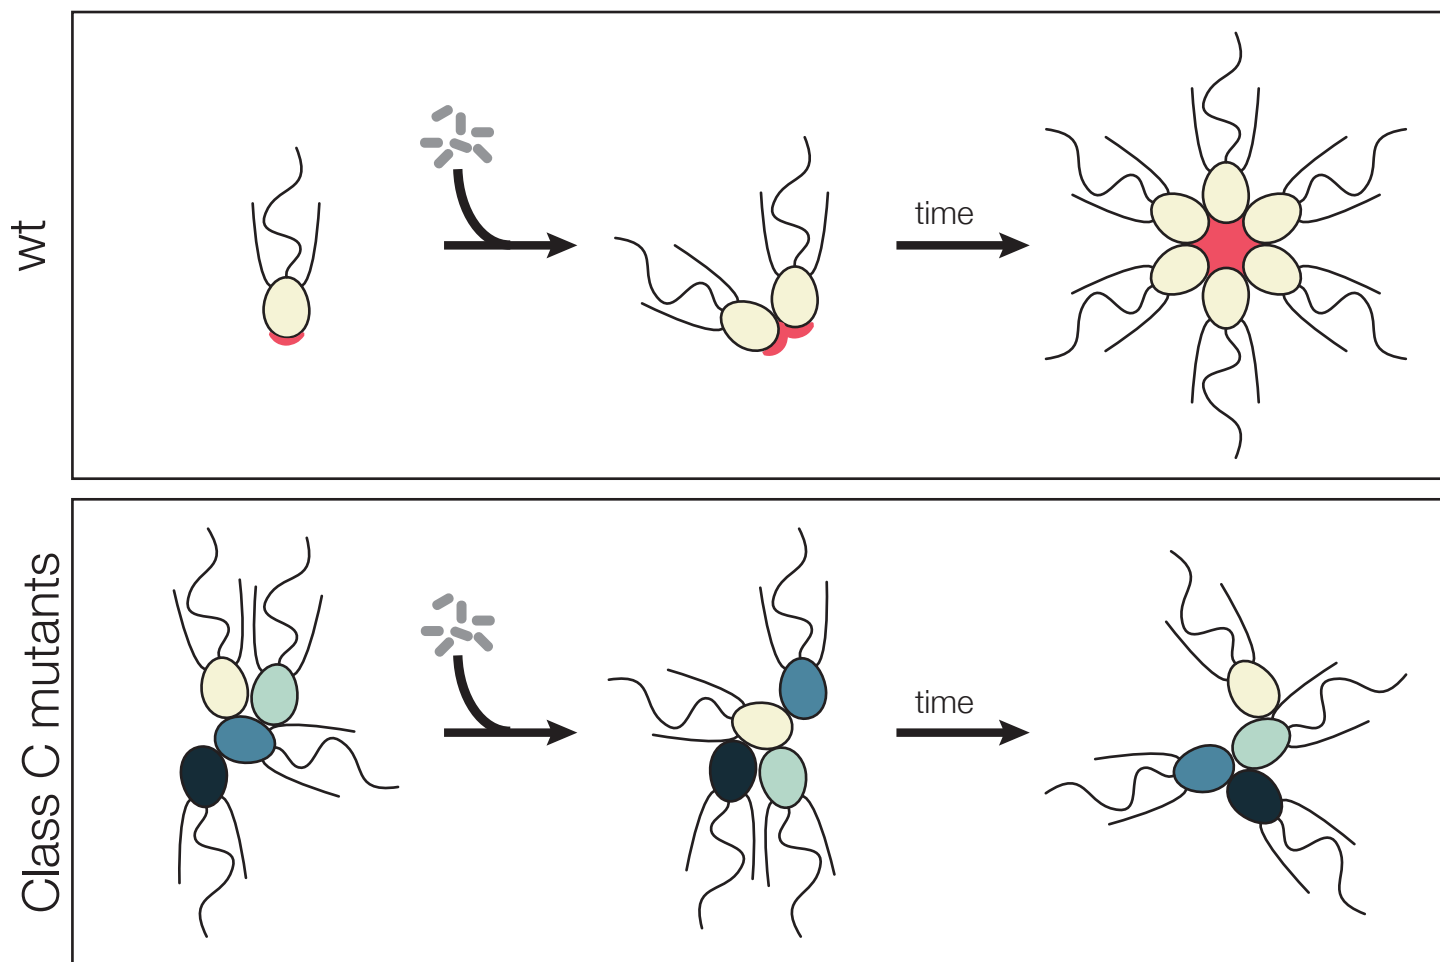

**Table 1. Phenotypes of wild type and Class C mutants**

| Strain    | % cells in rosettes | Cell interactions | Successful outcross? |
|-----------|---------------------|-------------------|----------------------|
| wild type | 87.7                | Non-clumping      | Yes                  |
| Seafoam   | 0                   | Clumping          | No                   |
| Soapsuds  | 0                   | Clumping          | No                   |
| Couscous  | 0                   | Clumping          | Yes                  |
| Jumble    | 0                   | Clumping          | Yes                  |
